# Supplementary material for: Global fatal landslide occurrence 2004 to 2016
Source: Copernicus journal article supplement (doi:10.5194/nhess-2018-49), 2018-03-01

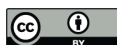

# GLOBAL FATAL LANDSLIDE OCCURRENCE 2004 TO 2016

Froude, Melanie J.<sup>1</sup> & Petley, David. N<sup>1</sup>

<sup>1</sup>. Department of Geography, The University of Sheffield, Sheffield, S10 2TN  
 United Kingdom

Correspondence email: [m.froude@sheffield.ac.uk](mailto:m.froude@sheffield.ac.uk)

## Abstract

Landslides are a ubiquitous hazard in terrestrial environments with slopes, incurring human fatalities in urban settlements, along transport corridors, or at sites of rural industry. Assessment of landslide risk requires high quality landslide databases. Recently, global landslide databases have shown the extent to which landslides impact on society and identified areas most at risk. Previous global analysis has focused on rainfall-triggered landslides over short ~5 year observation periods. This paper presents spatio-temporal analysis of a global dataset of fatal non-seismic landslides, covering the period from January 2004 to December 2016. The data show that in total 55,997 people were killed in 4,862 distinct landslide events. The spatial distribution of landslides is heterogeneous, with Asia representing the dominant geographical area. There are high levels of inter-annual variation in the occurrence of landslides. Although more active years coincide with recognised patterns of regional rainfall driven by climate anomalies, climate modes (such as ENSO) cannot yet be related to landsliding, requiring a 30+ year landslide dataset. Our analysis demonstrates landslide occurrence triggered by human activity is increasing, in particular in relation to construction, illegal mining and hill-cutting. This supports notions that human disturbance may be more detrimental to future landslide incidence than climate.

## 1. Introduction

Landslides are ubiquitous in any terrestrial environment with slopes, driven by tectonic (*e.g.* Bennett *et al.*, 2016), climatic (*e.g.* Moreiras, 2005) and/or human (Petley *et al.*, 2007) activities. Losses (fatalities, physical asset damage and economic costs) occur when people and their associated structures are exposed to landslides. The magnitude of the impact depends on the number of exposed

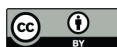

elements and their associated vulnerabilities; the consequences of the impacts; and the intensity of the landslide event (Glade and Crozier, 2005). Interest in quantifying landslide risk has developed since the attempt by the International Association of Engineering Geology (IAEG) Commission on Landslides to compile a list of worldwide landslide events for the UNESCO annual summary of information on natural disasters in 1971 (UNESCO, 1973). Although incomplete, five years of records (1971-1975) recognised that landslides are a significant global hazard, with *c.* 14% of total casualties from natural hazards being attributed to slope failure (Varnes and IAEG Commission on Landslides, 1984). Since, there has been a growing interest in landslide hazard and risk assessment (Wu *et al.*, 2015).

Key elements of the assessment of landslide risk are coherent, high quality landslide databases and inventories (van Western *et al.*, 2008; Van Den Eeckhaut and Hervás, 2012; Taylor *et al.*, 2015). These provide systematically compiled lists of landslide events that have occurred over a specific spatial scale (*e.g.* within a nation) within a set period of time, or that result from a single, catastrophic triggering event (Hervás and Bobrowsky, 2009). Spatio-temporal analysis of global records of landslides have demonstrated the extent to which landslides impact on society, and have identified geographical regions and countries most exposed (Petley, 2012). Several different global databases are actively maintained (*e.g.* the EM-DAT International Disaster Database, The NASA Global Landslide Catalogue, and the Global Fatal Landslide Database on which this study is based), and their merits and limitations are discussed by Van Den Eeckhaut and Hervás (2012) and Kirschbaum *et al.* (2015).

Relative to other natural disasters, the International Disaster Database (EM-DAT) suggests that landslides and mass movements account for 4.9 % of all natural disaster events and 1.3% of all natural hazard fatalities between 1990 and 2015; 54% of these landslide events occurred in Asia (Guha-Sapir *et al.*, 2018). However, the dedicated global landslide databases indicate that global multi-peril databases underestimate the impact of landslides on society. Petley (2012) showed that the EM-DAT database underestimated the number of fatal landslide events by ~2000% and fatalities by 430% between 2004 and 2010, whilst Kirschbaum *et al.* (2015) showed that the EM-DAT database



underestimated the number of fatal landslide events by ~1400% and fatalities by 331% between 2007 and 2013. For the most-part this under-reporting is associated with the perception of landslides as a secondary hazard, with the cause of death often being recorded in connection with the primary hazard (e.g. an earthquake rather than a co-seismic landslide), rather than the actual cause of the loss.

Past studies on global landslide distribution have focused on rainfall-triggered events, recognising the importance of rainfall and climate in inhabited regions with steep slopes (Kirschbaum *et al.*, 2012; Kirschbaum *et al.*, 2015). This paper not only provides a key update on the impact of landslides worldwide, extending Petley (2012) to include landslides from 2004 to 2016, the study considers trends in complex landslides triggered by human activity. Thereby, adding to the discussion on climate versus human disturbance as current and future drivers of landslide incidence (Crozier, 2010).

## 2. The Global Fatal Landslide Database

The Global Fatal Landslide Database (formerly termed the Durham Fatal Landslide Database) has been compiled using systematic, English language based, metadata search tools that identify relevant reports of landslide activity (including all mass movements falling within the definition of Hungr *et al.* (2014) on a daily basis (Petley *et al.*, 2005; Petley, 2010; 2012). In common with other hazard databases (Tschögl *et al.*, 2006; Taylor *et al.*, 2015), mass media reports provide a first alert for fatal landslide occurrence and impact. Reports are corroborated and data updated by source triangulation using government and aid agency reports, academic papers and personal communications, as new information becomes available. The dataset has been consistently collected and managed since 2004, following a period of methodological development between 1 September 2002 and 31 December 2003 (Petley, 2012). The approach is differentiated from that of Kirschbaum *et al.*, (2010; 2012; 2015) because: (1) only landslides that cause loss of life are included; and (2) all landslides are included, as opposed to only those triggered by rainfall. In addition, the global fatal landslide database has been compiled over a longer period. Although media reporting tends to be biased towards events with human casualties (Carrara *et al.*, 2003), which is favourable for a database of this nature, it is recognised that the data collected is to some degree an underestimate of the number of fatal



landslides, and their associated losses. Events that occur in remote mountain regions, or that result in a small number of fatalities, are less likely to be reported than multi-fatality events and/or those that occur in urban centres (Petley, 2009). Reliability of reporting is also spatially variable, based on the robustness of regional communication networks, which are considered more consistent in developed nations (Petley, 2010; Kirschbaum *et al.*, 2010), and in some cases political considerations (*e.g.* very few landslides are recorded in North Korea). The true number of fatalities may be slightly underestimated when victims die of landslide derived injuries weeks to months following the event (Petley, 2012). Furthermore, solely non-English reporting of events will account for some missed reporting. However, Sepúlveda and Petley (2015) compared the Global Fatal Landslide Database with an independently compiled database based on original Spanish and Portuguese language reports for Latin America, and found a difference of only 5% of total records, generally associated with landslides with small numbers of fatalities. Combined these effects may underestimate the true level of loss by up to 15% (Petley, 2012); however the methodology of collation of the Global Fatal Landslide Database is considered robust.

Since 2004, the database has been compiled to include the date of occurrence, the description of landslide location; an approximate latitude and longitude for that location; the country and geographical region (based on UN classifications, UNSD, 2018) in which the landslide occurred; the number of fatalities and injuries; and whether the event was triggered by precipitation, seismicity or another cause. Seismically triggered landslides in the database are excluded from analysis herein, because the catalogue of events is not considered complete (see Petley, 2012). These equate to 168 earthquake events and 3978 fatalities. In preparation of this paper, all landslide reports were reviewed to enhance the classification of the trigger event according to Table 1, using keyword searches in the original text describing the landslide. The median spatial precision of entries is 681 km<sup>2</sup>, with an interquartile range of 1 to 3477 km<sup>2</sup>; but all results are located to within political country boundaries.

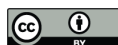

### 3. Global Fatal Landslide occurrence, 2004 to 2016

The total number of fatal landslides recorded worldwide, excluding those triggered by earthquakes, over the twelve calendar years between 2004 and 2016 (inclusive) was 4862. The spatial distribution of landslides (Fig. 1a and 1c) is clearly heterogeneous, with high areas of incidence in:

- Central America between Costa Rica and the South of Mexico
- The Caribbean islands.
- South America, along the Andes mountain range from Venezuela to Bolivia and to a lesser extent Chile, with another cluster of events on the east coast of Brazil around the states of Sao Paolo and Rio de Janeiro.
- East Africa, around the borders between Tanzania, Rwanda, Burundi, Kenya, Uganda and Democratic Republic of the Congo.
- Asia, which is the site of the highest number of events (75% of landslides).  
 Substantial numbers of landslides occur along the Himalayan Arc, in states across India and southeast China, as well as high numbers in the neighbouring countries of Laos, Bangladesh and Myanmar, and southwards on islands that form Indonesia and the Philippines.
- There are smaller clusters in Turkey and Iran, as well as in the European Alps.

Fatal landslides cluster around cities (Fig. 1c) and occur most frequently in countries with lower Gross National Income (GNI, Fig. 1c) at locations known to be susceptible to landslides, based on the analysis of physical characteristics of the environment (see Hong *et al.*, 2007; Stanley and Kirschbaum, 2017). Textual analysis of landslide reports shows many events occurred in mines or quarries (423 landslides), and 568 landslides in the dataset occurred on roads. Relative poverty is also emphasised in reporting: the term ‘slum’ is explicitly used to describe the impacted community 29 times, while broader terms to indicate relative poverty are used 267 times within landslide reports. These observations support previous research that fatal landslides are most prevalent in densely occupied urban centres (Alexander, 1989; Anderson, 1992; Petley, 2009), along roads (Hearn, 2011;

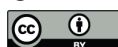

137 Lee *et al.*, 2018), and at sites rich in natural resources (Zou *et al.*, 2018). In common with other  
 138 natural hazards, the poor are disproportionately affected by landslides (Hallegatte *et al.*, 2018).

139 Fig. 2 shows landslide occurrence in pentads, smoothed with a 25-day (*i.e.* five pentad)  
 140 moving average. The most landslide events in a single pentad was 48, in early October 2009; of these  
 141 45 were triggered in a single day (8<sup>th</sup> October 2009) by Typhoon Parma in the Philippines. Rainfall is  
 142 the leading trigger of landslides. The majority of non-seismic fatal landslides (2004-2016) in the  
 143 database were triggered by precipitation (79%). Fig. 3a shows landslides triggered by rainfall in  
 144 pentads, compared with the complete non-seismic landslide dataset. The data series are strongly  
 145 correlated ( $R, 0.933, p\text{-value}, 0$ ), indicating that precipitation landslides explain 93% of the variance  
 146 of the complete dataset. Fig. 3b shows landslides that were not triggered by rainfall, and where the  
 147 trigger is known (*e.g.* mining). We term these events “complex landslides” herein. These landslides  
 148 constitute 16% of the complete dataset and present a different pattern through time when compared  
 149 with rainfall-triggered landslides. There is a notable increase in the number of landslides with  
 150 complex triggers from about 2006, which we ascribe to improved event capture.

151 The rainfall-triggered landslide data in Fig. 3a (and the complete landslide series, Fig. 2)  
 152 contain a strong seasonal pattern of landslide occurrence through the annual cycle, as noted by Petley  
 153 (2012). Autocorrelation measures the linear relationship between lagged values of a time series. The  
 154 autocorrelation of the rainfall-triggered pentad landslides series (Fig. S1) shows the correlation  
 155 coefficient between the original series and a lagged version of the series, where the series lags  
 156 between 1 to 948 pentads (5 days to ~13 years). The autocorrelation oscillates around 73.5 lags  
 157 (pentads), equating to one calendar year. This pattern is indicative of annual seasonality in the data.  
 158 Conversely, the autocorrelation of the complex landslides pentad series (Fig. S2) does not contain this  
 159 pattern and the correlation coefficients are generally weak. This indicates that there is no seasonal  
 160 pattern in the complex landslide series, which is to be expected in events that are not triggered by  
 161 meteorological processes.

162

163



### 164      **3.1. Seasonality**

165            Landslide occurrence peaks in the northern hemisphere summer, and there is notable inter-  
 166    annual variation, both in the size and shape of the annual cycle. Seasonality in the global series (Fig. 2  
 167    and 3a) is associated with the annual cycle of rainfall-triggered landslides in South, South East and  
 168    East Asia, and South and Central America (Fig. 4). Combined, these geographical regions contain  
 169    88% of all rainfall-triggered landslides and account for 96% of variance in the global seasonal cycle  
 170    (Table B1). There is a correlation between the mean monthly rainfall and landslide series, for four of  
 171    five regions (Fig. 5 and Table 2), reflecting the triggering effect of seasonal precipitation. However,  
 172    the strength of relationship between seasonal patterns of rainfall and the seasonal pattern of landslides  
 173    is variable between regions. The pattern is strongest in East Asia and South Asia. This corroborates  
 174    Petley (2012) who identified the strong relationship between landslide occurrence and seasonal  
 175    rainfall from a shorter period of data (2004 to 2009).

176            Seasonal rainfall in East and South Asia is associated with the onset and withdrawal of the  
 177    Asian monsoon (*e.g.* Webster, *et al.* 1998), delivered by the seasonal reversing of winds to flow from  
 178    ocean to land in the summer months, resulting in the majority of annual rainfall occurring between  
 179    June and September (Turner and Annamalai, 2012). In South Asia, landslide incidence increases in  
 180    Nepal, India, Bangladesh, Bhutan and northern Pakistan during the summer monsoon. India and  
 181    Nepal contribute 16% and 10% respectively of all rainfall-triggered landslides in the global dataset; of  
 182    these 77% and 93% occurred during the summer monsoon, meaning 21% of all rainfall-triggered  
 183    landslides globally were triggered by seasonal monsoon rainfall in India and Nepal. In East Asia,  
 184    tropical cyclones extend the length of the rainfall season: 109 landslides were triggered by typhoons  
 185    between April and October in China, Japan and South Korea, representing 16% of rainfall-triggered  
 186    landslides in East Asia, and 3% of global rainfall-triggered landslides. The East Asia landslide record  
 187    is dominated by events in China (81%, 503 landslides), of which 409 landslides were triggered during  
 188    the summer monsoon rainfall season. China alone contributes 15% of all global rainfall-triggered  
 189    landslides, although the pattern is heterogeneous.



190           Although, the seasonal landslide series for Central and South America do not explain much  
 191   variance in the global seasonal landslide cycle (because of the comparatively low number of  
 192   landslides), there is strong correlation between patterns of landslides in the region and patterns of  
 193   rainfall (Table 2). Central America and parts of the Caribbean experience a summer rainy season  
 194   between May and October, associated with the position of the Inter-Tropical Convergence Zone  
 195   (ITCZ; Garcia *et al.*, 2009). The season is bimodal, with peaks in rainfall either side of a midsummer  
 196   drought, between late June to August (Magaña *et al.*, 1999). The season is enhanced by the Atlantic  
 197   basin hurricane season from 1 June to 30 November (NOAA, 2018a). The pattern of landslides  
 198   reflects these precipitation drivers. South America spans ~70° of latitude leading to local variability in  
 199   climate (Sepúlveda and Petley, 2015). The peak annual rainfall for the continent as a whole occurs  
 200   during the period from December through to February, delivered by the South American Monsoon  
 201   System (SAMS), which is driven by the position of the ITCZ to the south of the equator (Garcia *et al.*,  
 202   2009). However, in parts of south-eastern Brazil, where there is a prevalence for fatal landslides (Fig.  
 203   1), the rainy season extends into March (Rao and Hada, 1990). In northern Peru, rainfall peaks  
 204   between April and June in the west, and is bimodal in the east, with peaks in April and December  
 205   (Espinoza *et al.*, 2009). Colombia's meteorology is particularly complex due to the convergence of  
 206   the Equatorial Mid-tropospheric Easterly Jet (EMEJ) and the Choco Jet; the resulting rainfall  
 207   distribution is bimodal, with peaks in April-June and August-September, depending on precise  
 208   location and the choice of rainfall data and model (Sierra *et al.*, 2015). Most rainfall-triggered fatal  
 209   landslides in South America occur in Brazil (37%) and Colombia (32%), most notably in south-  
 210   eastern Brazil and central Colombia, and this is evident in the distribution of annual rainfall and  
 211   landslide occurrence (Fig. 5d).

212           The weak relationship between rainfall and landslides in South East Asia reflects the complex  
 213   weather systems operating in the region. Most landslides occurred in the Philippines (46%) and  
 214   Indonesia (32%). Typhoons caused 22% of rainfall-triggered landslides in the region, and 5%  
 215   globally; most typhoon-triggered landslides occurred in July through to October (75%), in line with  
 216   the main tropical cyclone season. In the Philippines, 42% of rainfall-triggered landslides were caused





by Typhoons, whilst the equivalent value for Vietnam was 22%, although of a much lower total. The pattern of monsoon rainfall in Indonesia and the Philippines varies by geographical location. In the west of the Philippines, summer monsoon occurs between June and October, while in the east, the winter monsoon occurs between October and March (Kubota *et al.*, 2017). This pattern is evident in the distribution of rainfall-triggered landslides in the Philippines (Fig. 1a). The onset and termination of the monsoon in Indonesia varies from September to June in north Sumatra and late November to late May in east Java (Naylor *et al.*, 2007). Consequently, 72% of rainfall-triggered landslides occur between November and April, when the majority of Indonesia is experiencing monsoon rainfall. The peak in landslide activity relative to rainfall in August to October in South East Asia (Fig. 5b) is mainly due to the localised typhoon rainfall not captured in the regional rainfall average.

### 3.2. Medium term trend in landslide occurrence

There was a general increase in recorded landslide occurrence between 2004 to March 2010, followed by a general decrease in landslide occurrence through to April 2015, after which landslide incidence has generally increased (Fig. 6a). Petley (2012) identified improvements in the reporting of single fatality landslides as contributing to the general increase in events in the fatal landslide record from 2004 to 2010. The number of fatalities resulting from non-seismic landslides between 2004 and 2016 was 55997. Fig. 6b, shows that the pentad series of fatality is very noisy; the data do not contain an increasing or decreasing trend, nor are there distinguishable medium-term peaks in the data. Very few landslides generated more than 1000 fatalities (0.1%), and only one landslide resulted in more than 5000 fatalities. This was the Kedarnath landslide in June 2013 in Uttarakhand state, India, which was caused by extreme meteorological conditions that generated flooding and two large landslides in a mountainous area occupied by thousands of religious pilgrims (Allen *et al.*, 2015).

Landslides by the number of fatalities are grouped by the infinite series (1, 2, 4, 8, 16...). There is a significant increasing trend in single-fatality landslides (Fig. 7c); 29% of landslides were single-fatality events. There is also a weaker decreasing trend in landslides resulting in 64 to 128 fatalities (Fig. 7d); 1% of landslides were in this group. No other grouping contained a significant trend with time. Both the single fatality and 64 to 128 fatality series are above the regression line in



244 2010 (Fig. 7c and 7d). Removing these two groups from the global series (Fig. 7e) it is evident that  
 245 single fatality events enhanced the peak around 2010, and in 2016.

246 By year, different geographical regions experience above/below average landslide activity  
 247 (multi-fatality landslides, Fig. 7f; single-fatality landslides, Fig. 7g). In 2005, 2009, 2010 and 2011,  
 248 several regions experienced greater than average landslide occurrence simultaneously. The high  
 249 impact of landslides globally in 2010, has been discussed by previous authors (Kirschbaum *et al.*,  
 250 2012; 2015; Petley, 2012; Sepúlveda and Petley, 2015). The peak in landslide activity was generated  
 251 by anomalous landslide occurrence in several regions simultaneously (Fig. 7f and 7g), but overall the  
 252 geographical pattern of rainfall triggered landslides in 2009 and 2010 reflects the occurrence of a  
 253 moderate El Niño in 2009 and a moderate La Niña in 2010 (NOAA, 2018b).

254 In Central America, Kirschbaum *et al.* (2012) showed that precipitation was significantly  
 255 above average in the summer months in 2010, particularly in September. This increase was linked to  
 256 the known impacts of La Niña events on tropical cyclone frequency and track (*e.g.* Elsner *et al.*, 1999;  
 257 Curtis *et al.*, 2007). By number, 2010 was the year in which the most landslides (17 events, compared  
 258 with an average 6 events per year), were directly associated with tropical cyclones in reports or related  
 259 to storm tracks (based on NOAA, 2018c). Although, these landslides only equate to 35% of all  
 260 rainfall-triggered landslides within 2010, the remaining 65% of events, not triggered by a tropical  
 261 cyclone all occurred during the hurricane season (May to November), likely due to unsettled weather  
 262 associated with the passage of large storms in the region. Central America receives tropical cyclones  
 263 from the Atlantic basin and the North Pacific basin (NOAA, 2018c). Storms from the Atlantic basin  
 264 may make landfall along the eastern coastline of Central America and travel inland, occasionally  
 265 retaining enough energy to cross over into the Pacific. Storms that have crossed over basins or new  
 266 storms, which have formed in the Northeast Pacific basin, may make landfall on the western coast of  
 267 Central America. Not only were the frequency of landfalling tropical storms and hurricanes elevated  
 268 from both basins in 2010, but the track of these storms intercepted populated areas in steep terrain  
 269 (NOAA, 2018c). The majority of rainfall-triggered landslides in Central America in 2010 were in  
 270 Mexico and Guatemala (43% and 37%, respectively). In Guatemala, eight landslides were triggered



271 by Tropical Storm Agatha in late May 2010, causing 182 fatalities. Four landslides were associated  
 272 with Hurricane Alex which travelled up the east coast of Guatemala, Honduras and then inland to  
 273 Mexico in late June-July 2010. Hurricane Karl then made landfall on the east coast of Mexico in  
 274 September: two landslides are associated with this storm (killing 12), but a succession of fatal  
 275 landslides in the states of Oaxaca, Chiapis and Puebla through which the hurricane passed, were noted  
 276 in the weeks following the storm.

277 Sepúlveda and Petley (2015) observed a weak correlation between La Niña conditions in late  
 278 2010-2011 and heightened landslide activity in Colombia and Venezuela. Considering a longer time  
 279 series (2004 to 2016), this study identifies above average landslide activity in several nations in South  
 280 America in 2009 and 2011. In Brazil, 54% of all rainfall-triggered events occurred between 2009 and  
 281 2011. Activity peaked in December 2009 to April 2010 (El Niño) and January 2011 (La Niña),  
 282 corresponding with the seasonal ENSO precipitation patterns observed by Grimm and Tedeschi  
 283 (2009). The number of landslides in Venezuela and Colombia between 2009 and 2011 peaked in  
 284 November 2010, associated with positive rainfall anomalies during the austral summer La Niña  
 285 (Tedeschi *et al.*, 2013).

286 The majority of landslides in East Asia occur in China (83%); in 2010, 87% of all rainfall-  
 287 triggered events were located in China, and rainfall-triggered landslide occurrence (67 landslides) was  
 288 above the mean (45 landslides). From a shorter period of observation, Kirschbaum *et al.* (2012)  
 289 identified a high incidence of rainfall-triggered landslides (fatal and non-fatal) in central eastern China  
 290 in 2010: particularly in July and August corresponding with a peak in rainfall. Rainfall-triggered  
 291 landslides were above average for most months in 2010 in China, but May through to September was  
 292 very active (57 landslides compared with an average 38). The East Asian subtropical summer  
 293 monsoon (a component of the East Asian monsoon) has a significant effect on seasonal variations in  
 294 rainfall across China (He and Liu, 2016), and precipitation patterns alter in response to ENSO  
 295 conditions (Yang and Lau, 2004; He *et al.*, 2007; Zhou *et al.*, 2014).

296 In China in 2010, there were fewer than average landslides triggered by tropical cyclones  
 297 from the Northwest Pacific basin. There was low typhoon activity due to the rapid transition from the



298 2009/2010 El Niño to the 2010/2011 La Niña, which altered airflows in the North West Pacific basin  
 299 (Kim *et al.*, 2012). Conversely, in the Philippine domain, tropical cyclone occurrence was above  
 300 average in July to December 2009 (Corporal-Lodangco *et al.*, 2015). During the northern hemisphere  
 301 summer months of an El Niño, the genesis location of tropical cyclones shifts eastwards (Chan 1985;  
 302 Chan 2000; Chia and Ropelewski, 2002). In these conditions, cyclones travel further before they may  
 303 make landfall, enabling them to strengthen (Camargo and Sobel, 2005), and there is a tendency for  
 304 more storms to affect the northern-central Philippines (Lyon and Camargo, 2009). In 2009, 67% of  
 305 rainfall-triggered landslides in the Philippines were associated with tropical cyclones: 60 landslides  
 306 compared with an average 12 triggered by tropical cyclones. As noted previously, many of these were  
 307 triggered on the same day (8 October 2009) by Typhoon Parma.

308 Although the peak in landslides in South East Asia in 2009 is dominated by typhoon triggered  
 309 landslides in the Philippines, there was an increase in landslides in Indonesia (33 landslides compared  
 310 with an average of 24 per year); of these 24 events were triggered by rainfall, 8 by mining and one  
 311 trigger was not known. Rainfall-triggered landslides were very slightly above average in Indonesia in  
 312 2009 but it was the events triggered by human activity, which contributed most to the anomalous  
 313 landsliding in Indonesia. These landslides are discussed in the next section.

314 Between 2004 and 2016, four El Niño events occurred: weak El Niño (2004/2005,  
 315 2006/2007), strong El Niño (2009/2010) and very strong El Niño (2014/2016; NOAA, 2018b). Weak  
 316 La Niña was observed in 2005/2006, 2008/2009, 2016, and strong La Niña in 2007/2008 and  
 317 2010/2011 (NOAA, 2018b). There does not appear to be a consistent relationship between ENSO  
 318 phase and the regional distribution of landslides, although elevated regional rainfall (and thus  
 319 landslides) has been associated with ENSO sea-surface temperature (SSTs) anomalies. The peak in  
 320 landslides in Central America in 2005 is composed predominantly of tropical storm and hurricane  
 321 triggered landslides in El Salvador, Mexico, Guatemala and Honduras. The 2005 North Atlantic  
 322 Hurricane season was the most active since records began in 1851, driven by high SSTs in the  
 323 Tropical North Atlantic (10°-20°N) linked with global warming and the 2004/2005 El Niño  
 324 (Trenberth and Shea, 2005). Landslides were also above average in 2005 in East Asia: most events



325 occurring in China, triggered by monsoon rainfall. In South Asia, landslides peaked in 2007, 2014 and  
 326 2016, the majority associated with monsoon rainfall in Bangladesh, India, Nepal and Pakistan.  
 327 Variability in rainfall from the South Asian monsoon is related to the interaction between SSTs in the  
 328 Indian Ocean dipole (IOD) and ENSO (*e.g.* Ashok *et al.*, 2007; Lu *et al.*, 2017).

329 The complexity of climate systems means it is not possible to draw conclusions on the  
 330 relationship between climate mode and landslide occurrence from this 13 year global dataset.  
 331 However, longer local records show promise at unpicking the impact of climate cycles on landslides.

### 332 3.3. Complex Triggers

333 Of the 4862 non-seismic landslides in the complete database, 770 (16%) were generated by a complex  
 334 trigger, and resulted in a total 3725 fatalities (Fig. 7). The majority of landslides were triggered by  
 335 mining (232 multi-fatality landslides, 67 single-fatality landslides), construction (170 multi-fatality  
 336 landslides, 140 single-fatality landslides) or illegal hillcutting (60 multi-fatality landslides, 27 single-  
 337 fatality landslides); and the majority of fatalities in all cases were people at work (90%, 76% and 84%  
 338 respectively). Globally there is a statistically significant increase in events by these three triggers (Fig.  
 339 8a, 8b and 8c); multi-fatality landslides are differentiated from single-fatality events, which increased  
 340 with time independent of trigger (Fig. 6c). By country, most construction triggered landslides  
 341 occurred in India (28%), followed by China (9%), Pakistan (6%), the Philippines (5%), Nepal (5%)  
 342 and Malaysia (5%; Fig. 9a). On average construction triggered landslides killed three people, however  
 343 a particularly severe landslide in Shenzhen, China in December 2015 killed 77 people. The event  
 344 involved the collapse of construction waste on worker quarters in an industrial site. Interestingly, the  
 345 context in which the landslides occur differs between countries. In China, the majority of events  
 346 (52%) occur in urban construction sites, while very few landslides occur on roads (7%). Conversely,  
 347 in India and Nepal, 30% and 43% of landslides triggered by construction occurred on roads.

348 Transportation is a “crucial driver of development” (World Bank, 2018b); however, in  
 349 mountain regions roads are closely connected with landslide risk (Lennartz, 2013). The road network  
 350 in Nepal has quadrupled in length over the last 18 years (Govt. of Nepal, 2016), and in India it has



351 nearly tripled in length in 24 years (Govt. of India, 2016). Population growth is frequently  
 352 accompanied by the expansion of infrastructure and settlements (Gardner and Dekens, 2007), and this  
 353 is true in India and Nepal, which have grown by ~7% between 2010 and 2015 (World Bank, 2018a).  
 354 Both countries are on a trajectory to expand their national road networks further. Increased landslide  
 355 activity in the Himalayan region has been associated with road construction (Ives and Messerli, 1989;  
 356 Haigh *et al.*, 1989; Valdiya, 1998; Barnard *et al.*, 2001; Petley *et al.*, 2007; Sait *et al.*, 2011; Singh *et*  
 357 *al.*, 2014). Hearn and Shakya (2017) highlighted that road construction without proper route choice,  
 358 engineering design and management of spoil, increases landslide susceptibility. Fatal landslides  
 359 triggered by road construction indicate that excavation may not always be undertaken with due care  
 360 and appropriate slope engineering. Furthermore, the coincidence of construction worker and road user  
 361 fatalities from the same landslide suggests that there is pressure to keep roads under construction  
 362 open. Ives and Messerli (1989) emphasised the economic impact when roads are closed.

363       Between 2004 and 2016, China experienced a 6% growth in population to 1.379 billion, and a  
 364 16% rise in the proportion of the population living in urban areas (World Bank, 2018a). Urban growth  
 365 in China is driven by political policy for economic growth; economic reforms from 1978, opened  
 366 China's markets to foreign investors and relaxed migration controls, prompting rapid rural-urban  
 367 migration (Ma, 2002; Anderson and Ge, 2004). Although urbanization is encouraged by China to  
 368 increase domestic consumption, urban growth is often uncontrolled (Fang and Pal, 2016), leading to  
 369 rapid land conversion, dispersion and fragmentation of development (Schneider and Woodcock,  
 370 2008). Critically, many of China's largest cities are bounded by mountains, and urban sprawl is  
 371 encroaching on land unsuitable for development (Yu and Li, 2011). Reports in the database indicate  
 372 that fatal landslides in urban construction sites in China often occurred when engineered cut slopes  
 373 failed above the construction site (*e.g.* Zhang *et al.*, 2012), from improper construction of foundations  
 374 leading to building collapse before completion (*e.g.* Srivastava *et al.*, 2012), or from mismanagement  
 375 of construction and demolition waste (*e.g.* Yang *et al.*, 2017). In these entirely preventable  
 376 circumstances, explicit national regulation and enforcement should reduce construction related  
 377 landslide impact in China.



378           The increase in events triggered by mining is driven by the increase in landslides triggered by  
 379   illegal or unregulated extraction (Fig. 8d); landslides triggered by legal mining (Fig. 8e) or where the  
 380   legitimacy of the mining is unknown (Fig. 8f), do not show a statistically significant trend. By  
 381   country, India (12%), Indonesia (11.7%), China (10%), Pakistan (7%) and Philippines (7%) contribute  
 382   most to the record of landslides triggered by mining (Fig. 9b). Fatal landslides triggered by illegal  
 383   mining practises have occurred in 32 countries (Fig. 9c). By number of events, Indonesia (24) and  
 384   India (15) rank the highest, however by number of fatalities Myanmar (403 fatalities from 9  
 385   landslides) stands out. Shifts in spending power and the infusion of the internet and smart-technology  
 386   in daily life have driven an exponential increase in the consumption of electronics, placing pressure  
 387   on the demand for rare earth elements (Dutta *et al.*, 2016). Furthermore, growth in the precious stone  
 388   market fuelled both by economic uncertainty, and a growing middle class in Asian nations such as  
 389   China, where gemstones are a key part of cultural heritage (The Economist, 2011), is thought to have  
 390   led to an increase in the number of small-scale mining operations globally (Hruschka and Echavarría,  
 391   2011), and the upscaling of small-scale mines to larger scale operations. Fatal landslides in Myanmar  
 392   (Burma) have significantly increased because of the unregulated expansion in jade mining within the  
 393   Kachin state. Critically, the high value of jade and lack of enforced operator accountability appears to  
 394   be driving poor mining practises, which place workers and local residents at risk of slope collapse  
 395   (Global Witness, 2015). Demand for rare earth elements and gemstones are thus driving an increase in  
 396   mining-related landslides, with the potential for landslide occurrence to rival that associated with rural  
 397   road expansion.

398           Cutting slopes for the purposes of obtaining earth surface materials, or to alter slope geometry  
 399   during construction, may result in slope failure if the site is not properly engineered. The term hill-  
 400   cutting is used here in relation to discrete slopes that have been altered without permission for the  
 401   purposes of small-scale construction, earth material extraction or agriculture. Hill-cutting is most  
 402   strongly associated with urban areas in Bangladesh in the academic literature (*e.g.* Chittagong;  
 403   Ahmed, 2015 or Syhlet; Islam *et al.*, 2006). In the fatal landslide database it is an increasing problem  
 404   in Bangladesh, India and Nepal (Fig. 8c and 9d). Most fatalities occurred as people collected hillslope



405 materials for construction of their housing in rural communities, and reports indicate those involved  
 406 were from poor families living in informal settlements. In total, 11 of the 87 landslides were directly  
 407 related to the practice of using hillslope coloured clay for the decorative coating of houses for a  
 408 religious festival; of these, nine occurred in Nepal. Critically, children are often caught up in slides  
 409 triggered by hill-cutting in Nepal: at least 40% of landslide victims were children, while a further 25%  
 410 of victims were a combination of adults (predominantly women) and children working together.  
 411 Conversely, in Bangladesh the majority of victims were adults (78%) of which 79% were male. In  
 412 Nepal, India and Bangladesh, clay is an important local building material for housing, particularly in  
 413 settlements not connected to the road network, but there is a legal framework in Bangladesh to  
 414 prevent hill-cutting (Building Construction Act 1952, 1990 and the Bangladesh Environmental  
 415 Conservation Act 1995; Murshed, 2013). Building codes in Nepal provide basic guidance on slope  
 416 stability, specifically slope excavation, identification of slope instability and construction of  
 417 foundations (DUDBC, 1994); however residents in rural communities may not have access to this  
 418 information and be unaware of the hazard (Oven *et al.*, 2008). Furthermore, in India it was noted that  
 419 building regulations do not account for the geo-environmental context of the settlement, sometimes  
 420 lack clarity, and are difficult to uphold due to a shortage of technical experts and inadequate provision  
 421 to stop illegal activity (Kumar and Pushplata, 2014).

422 While this section discusses fatal landslides triggered by human activity, many rainfall-  
 423 triggered landslides occur on slopes which have been modified during construction (82 landslides),  
 424 agriculture and forestry (45 landslides) and mining (123 landslides); or at sites where storage of waste  
 425 has not been poorly managed (16 landslides). Of course, it is expected the majority of fatal landslides  
 426 (94%) will occur within settlement boundaries or along infrastructure, however it is evident from this  
 427 database of events that human action damages slopes increasing their susceptibility to fail.

#### 428 **4. Discussion and Conclusion**

429 With the benefit of a 13 year time series, this study builds on past analyses of the Global Fatal  
 430 Landslide dataset, providing not only an update on the spatial and temporal distributions of landslide  
 431 impact, but also serving to highlight the importance of annual climate variability in specific landslide





prone regions on the global record. In addition, it provides new insights into the impact of human activity on landslide incidence. The data does not indicate a discernible long-term increase or decrease in global landslide impact; rather the record shows that there is considerable inter-annual variability in global landslide incidence. The more active years have been associated with recognised regional patterns of rainfall, in part driven by global climate anomalies, but there is no simple relationship with, for example, the El Niño Southern Oscillation (ENSO). Relating climate modes to patterns of landsliding is challenging because of climate complexity and change, requiring 30 year + datasets. Future work bridging advances in climate science on regional impacts from ENSO diversity, with local patterns of landsliding, in acutely affected areas such as India, China and Nepal, will provide useful models for forecasting seasonal rainfall distribution and landslide impact.

Our analyses have demonstrated that landslide occurrence triggered by human activity is increasing, in particular in relation to construction, illegal mining and illegal hillcutting. Human disturbance (land use change) may be more detrimental to future landslide incidence than climate change (Crozier, 2010; Anderson and Holcombe, 2013), and this is evidenced by a number of studies (Innes, 1983; Glade, 2003; Soldati *et al.*, 2004; Imaizumi *et al.*, 2008; Borgatti and Soldati, 2010; Lonigro *et al.*, 2015). Fatal landslides occur when construction and mining: (1) do not apply appropriate slope engineering, (2) mismanage spoil and, (3) do not undertake a feasibility assessment (Hearn and Shakya, 2017). Appropriate building regulations that account for the geo-environmental context of the settlement, provide clear guidance on engineering and are enforced by local technical experts, are paramount in managing landslide risk associated with urbanization and natural resource exploitation.

Holcombe *et al.* (2016) emphasised that planning policy alone is not sufficient to control landslide risk in **developing nations**, because of the rapid and informal nature of construction, and low-income of residents, who cannot finance expert guidance when building their homes. Settlements are often built on hazardous land around urban centres and on roadsides, because of the benefits of service access and employment opportunities (Smyth and Royale, 2000; Oven *et al.*, 2008; Lennartz, 2013; Anhorn *et al.*, 2015). Hillcutting is the dominant driver of instability during informal construction (Holcombe *et al.*, 2016), and our results indicate fatal landslides triggered by hillcutting

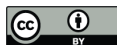

460 are increasing in Bangladesh, India and Nepal. Several landslides were triggered when people cut  
461 slopes to collect coloured clay to decorate their houses for religious festivals. Here, simple  
462 communication of landslide risk by local non-governmental organisations (NGOs) could prevent  
463 future fatalities from this practice. Where governments are limited in capacity at a local level, NGOs  
464 are important in implementing disaster risk reduction (Jones *et al.*, 2016), such as supporting  
465 community-based slope engineering (*e.g.* Mossaic; Anderson and Holcombe, 2006).

466       Reporting of fatal landslides is likely to increase with the global growth in mobile technology  
467 and internet access. Furthermore, advances in web mining (data retrieval from the internet based on  
468 search criteria) and text mining (transforms unstructured data into structured to discover knowledge)  
469 using machine learning offer methods to improve capture of landslide reporting and data evaluation  
470 (*e.g.* Bhatia and Khalid, 2008; Kumar *et al.*, 2018). Continued collection of the database will develop  
471 our understanding of the effect of climate and human disturbance on global landslide impact. The  
472 dataset is a useful tool in identifying acutely landslide prone parts of the world and specific local  
473 drivers of landslide impact; thereby highlighting locations which would benefit from further  
474 development in early warning technology, landslide risk assessment and community capacity  
475 building; in support of the future directions of the International Consortium on Landslides (Alcantara-  
476 Ayala *et al.*, 2017).

477



478 **Figures**

479 **Figure 1.** (a) The location of non-seismically triggered fatal landslides from AD 2004 to 2016.

480 Individual landslides shown by a black dot. (b) Number of non-seismically triggered fatal landslides  
 481 from AD 2004 to 2016 by country. (c) The Gross National Income per capita (US \$) by country  
 482 (World Bank, 2018), and the location of major urban centres globally (ESRI, 2018).

483 **Figure 2.** The occurrence of non-seismically triggered landslides from AD 2004 to 2016, and  
 484 cumulative total of recorded events. The data are arranged by pentads (five-day bins), starting on the  
 485 1st January each year, thus the first pentad includes records for 1-5 January, and there are a total 73  
 486 pentads. A simple 25-day moving average is shown.

487 **Figure 3.** (a) The occurrence of rainfall triggered landslides from AD 2004 to 2016 (blue). The data  
 488 are arranged by pentads (five-day bins), starting on the 1st January each year. A simple 25-day  
 489 moving average is shown. The 25-day moving average for all non-seismically triggered landslides, is  
 490 shown in black. (b) The occurrence of complex landslides from AD 2004 to 2016 (purple). The data  
 491 are arranged by pentads (five-day bins), starting on the 1st January each year. A simple 25-day  
 492 moving average is shown. The 25-day moving average for all non-seismically triggered landslides, is  
 493 shown in black.

494 **Figure 4.** Mean number of landslides per pentad through the annual cycle for all rainfall-triggered  
 495 landslides, and by geographical region. The 20th pentad is the 6-10 April, the 40th pentad is 15-19  
 496 July and 60th pentad is 23- 27 October.

497 **Figure 5.** Mean daily rainfall (mm) by month between AD 2004 and 2016 summarised by  
 498 geographical sub-region (blue bars). Global Precipitation Climatology Centre data (Xie *et al.*, 2013;  
 499 GPCC, 2018) was processed in ESRI ArcMap and Matlab. Mean daily rainfall-triggered landslide  
 500 occurrence by month between AD 2004 and 2016 (black line). Daily values are used to overcome the  
 501 difference in month length.

502 **Figure 6.** (a) The occurrence of non-seismically triggered landslides from AD 2004 to 2016: 25 day  
 503 and 1 year moving average (see also Fig. 2). (b) The number of fatalities from non-seismically



504 triggered landslides from AD 2004 to 2016 by pentad with 25 day moving average. (c) Number of  
505 single fatality landslides AD 2004 to 2016. (d) Number of landslides incurring 64 to 128 fatalities per  
506 event from AD 2004 to 2016. (e) Comparison of the complete landslide series (Fig. 6a) and multi-  
507 fatality landslide series (excluding the 64 to 128 fatality class). (f) Anomalies in landslide occurrence  
508 by year by geographical region (multi-fatality events). (g) Anomalies in landslide occurrence by year,  
509 by geographical region (single fatality events). Values greater than 1 standard deviation from the  
510 mean are shown by a grey circle. Values greater than 2 standard deviations from the mean are shown  
511 by a black circle.

512 **Figure 7.** Distribution of triggers of complex landslides (770 events).

513 **Figure 8.** Number of landslides triggered per year by (a) construction, (b) mining, (c) illegal hill-  
514 cutting, (d) illegal mining, (e) legal mining and (f) mining (not specified). The black series contains  
515 only multi-fatality landslides. The grey series contains single and multi-fatality landslides.

516 **Figure 9.** By country, the number of landslides triggered by (a) construction, (b) mining, (c) illegal  
517 mining and (d) hill-cutting, between A.D. 2004 to 2016.

518

519



520 **Data availability**

521 The global fatal landslide database (2004 to 2016) is not currently available to the public, however a  
522 web-platform is under-development to host the data openly at the University of Sheffield, UK.

523

524 **Appendix A**

525 **Figure A1.** Sample autocorrelation plot for the pentad rainfall-triggered landslides. The 99%  
526 confidence interval is shown by the blue horizontal lines.

527 **Figure A2.** Sample autocorrelation plot for the pentad complex landslides. The 99% confidence  
528 interval is shown by the blue horizontal lines.

529 **Appendix B**

530 **Table B1.** Hierarchal linear regression results comparing the impact of seasonality in geographical  
531 regions with the global mean number of landslides per pentad through the annual cycle (see Fig. 4).  
532 The data series for each geographical region are sequentially added into the regression (such that the  
533 second row of the table is a regression of S.Asia + S.E. Asia with the global series).

534

535 **Author contribution**

536 DP developed the methodology (2002-2003) and has consistently collected the database since 2004.  
537 MF analysed the data and wrote up the results for this submission. DP contributed to writing.

538 **Competing interests**

539 The authors declare that they have no conflict of interest.

540 **Acknowledgements**

541 The research has been supported by the NERC/Newton Fund grant NE/N000315/1 and  
542 NE/N000315/2.

543

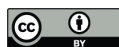

## 544 **References**

- 545 Ahmed, B.: Landslide susceptibility mapping using multi-criteria evaluation techniques in Chittagong  
 546 Metropolitan Area, Bangladesh, *Landslides*, 12(6), 1077–1095, doi:10.1007/s10346-014-0521-x,  
 547 2015.
- 548 Alcántara-Ayala, I., Sassa, K., Mikoš, M., Han, Q., Rhyner, J., Takara, K., Nishikawa, S., Rouhban,  
 549 B. and Briceño, S.: The 4th World Landslide Forum: Landslide Research and Risk Reduction for  
 550 Advancing the Culture of Living with Natural Hazards, *Int J Disaster Risk Sci*, 8(4), 498–502,  
 551 doi:10.1007/s13753-017-0139-4, 2017.
- 552 Alexander, D.: Urban landslides, *Progress in Physical Geography: Earth and Environment*, 13(2),  
 553 157–189, doi:10.1177/030913338901300201, 1989.
- 554 Allen, S. K., Rastner, P., Arora, M., Huggel, C. and Stoffel, M.: Lake outburst and debris flow  
 555 disaster at Kedarnath, June 2013: hydrometeorological triggering and topographic predisposition,  
 556 *Landslides*, 13(6), 1479–1491, doi:10.1007/s10346-015-0584-3, 2016.
- 557 Anderson, M. G. and Holcombe, E.: *Community-Based Landslide Risk Reduction: Managing*  
 558 *Disasters in Small Steps*, World Bank Publications., 2013.
- 559 Anderson, M. G. and Holcombe, E.A., *Sustainable Landslide Risk Reduction in Poorer Countries*,  
 560 *Proceedings of the Institution of Civil Engineers- Engineering Sustainability*, 159, 23–30, 2006.
- 561 Anderson, G. and Ge, Y.: Do Economic Reforms Accelerate Urban Growth? The Case of China,  
 562 *Urban Stud.*, 41(11), 2197–2210, doi:10.1080/0042098042000268410, 2004.
- 563 Anderson, M. B.: Metropolitan areas and disaster vulnerability: a consideration for developing  
 564 countries, [online] Available from: <https://www.popline.org/node/325322>, 1992.
- 565 Anhorn, J., Lennartz, T., and Nüsser, M., Rapid urban growth and earthquake risk in Musikot, mid-  
 566 western hills, Nepal, *Erdkunde*, 69(4), 307–325, 2015.



- 567 Ashok, K. and Saji, N. H.: On the impacts of ENSO and Indian Ocean dipole events on sub-regional  
 568 Indian summer monsoon rainfall, *Nat. Hazards*, 42(2), 273–285, doi:10.1007/s11069-006-9091-0,  
 569 2007.
- 570 Barnard, P. L., Owen, L. A., Sharma, M. C. and Finkel, R. C.: Natural and human-induced landsliding  
 571 in the Garhwal Himalaya of northern India, *Geomorphology*, 40(1), 21–35, doi:10.1016/S0169-  
 572 555X(01)00035-6, 2001.
- 573 Bennett, G. L., Miller, S. R., Roering, J. J. and Schmidt, D. A.: Landslides, threshold slopes, and the  
 574 survival of relict terrain in the wake of the Mendocino Triple Junction, *Geology*, 44(5), 363–366,  
 575 doi:10.1130/G37530.1, 2016.
- 576 Bhatia, M. and Khalid, A. K.: Information retrieval and machine learning: Supporting technologies  
 577 for web mining research and practice, *Webology*, 5(2), [online] Available from:  
 578 <http://www.webology.org/2008/v5n2/a55.html>, last access: 15 February 2018, 2008.
- 579 Borgatti, L. and Soldati, M.: Landslides as a geomorphological proxy for climate change: A record  
 580 from the Dolomites (northern Italy), *Geomorphology*, 120(1), 56–64,  
 581 doi:10.1016/j.geomorph.2009.09.015, 2010.
- 582 Camargo, S. J. and Sobel, A. H.: Western North Pacific Tropical Cyclone Intensity and ENSO, *J.*  
 583 *Clim.*, 18(15), 2996–3006, doi:10.1175/JCLI3457.1, 2005.
- 584 Carrara, A., Crosta, G. and Frattini, P.: Geomorphological and historical data in assessing landslide  
 585 hazard, *Earth Surf. Processes Landforms*, 28(10), 1125–1142, doi:10.1002/esp.545, 2003.
- 586 Chan, J. C. L.: Tropical Cyclone Activity over the Western North Pacific Associated with El Niño and  
 587 La Niña Events, *J. Clim.*, 13(16), 2960–2972, doi:10.1175/1520-  
 588 0442(2000)013<2960:TCAOTW>2.0.CO;2, 2000.
- 589 Chan, J. C. L.: Tropical Cyclone Activity in the Northwest Pacific in Relation to the El Niño/Southern  
 590 Oscillation Phenomenon, *Mon. Weather Rev.*, 113(4), 599–606, doi:10.1175/1520-  
 591 0493(1985)113<0599:TCAITN>2.0.CO;2, 1985.



- 592 Chia, H. H. and Ropelewski, C. F.: The Interannual Variability in the Genesis Location of Tropical  
 593 Cyclones in the Northwest Pacific, *J. Clim.*, 15(20), 2934–2944, doi:10.1175/1520-  
 594 0442(2002)015<2934:TIVITG>2.0.CO;2, 2002.
- 595 Crozier, M. J.: Deciphering the effect of climate change on landslide activity: A review,  
 596 *Geomorphology*, 124(3), 260–267, doi:10.1016/j.geomorph.2010.04.009, 2010.
- 597 Curtis, S., Salahuddin, A., Adler, R. F., Huffman, G. J., Gu, G. and Hong, Y.: Precipitation Extremes  
 598 Estimated by GPCP and TRMM: ENSO Relationships, *J. Hydrometeorol.*, 8(4), 678–689,  
 599 doi:10.1175/JHM601.1, 2007.
- 600 DUDBC, Building Codes, Department of Urban Development and Building Construction, Ministry of  
 601 Urban Development, Government of Nepal, Nepal: <http://www.dudbc.gov.np/?lang=en>, last access:  
 602 20 February 2018, 1994.
- 603 Dutta, T., Kim, K.-H., Uchimiya, M., Kwon, E. E., Jeon, B.-H., Deep, A. and Yun, S.-T.: Global  
 604 demand for rare earth resources and strategies for green mining, *Environ. Res.*, 150, 182–190,  
 605 doi:10.1016/j.envres.2016.05.052, 2016.
- 606 Elsner, J. B., Kara, A. B. and Owens, M. A.: Fluctuations in North Atlantic Hurricane Frequency, *J.*  
 607 *Clim.*, 12(2), 427–437, doi:10.1175/1520-0442(1999)012<0427:FINAHF>2.0.CO;2, 1999.
- 608 Espinoza Villar, J. C., Ronchail, J., Guyot, J. L., Cochonneau, G., Naziano, F., Lavado, W., De  
 609 Oliveira, E., Pombosa, R. and Vauchel, P.: Spatio-temporal rainfall variability in the Amazon basin  
 610 countries (Brazil, Peru, Bolivia, Colombia, and Ecuador), *Int. J. Climatol.*, 29(11), 1574–1594,  
 611 doi:10.1002/joc.1791, 2009.
- 612 ESRI (2018) World Cities data,  
 613 <http://www.arcgis.com/home/item.html?id=dfab3b294ab24961899b2a98e9e8cd3d>, last access:  
 614 19/02/2018
- 615 Fang, Y. and Pal, A., Drivers of Urban Sprawl in Urbanizing China – A Political Ecology Analysis,  
 616 *Environment and Urbanization*, 28(2), 599–616, DOI: 10.1177/0956247816647344, 2016.



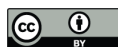

- 617 Garcia, N. Ferreira, R.N. and Latrubesse, E.M.: Ch1 Climate and Geomorphologic-related Disasters  
 618 in Latin America, in: Latrubesse, E.M. (eds.) Natural Hazards and Human-Exacerbated Disasters in  
 619 Latin America: Special Volumes of Geomorphology, Elsevier, Nature, Amsterdam, Netherlands, 550  
 620 pp., 2009.
- 621 Gardner, J. S. and Dekens, J.: Mountain hazards and the resilience of social–ecological systems:  
 622 lessons learned in India and Canada, Nat. Hazards, 41(2), 317–336, doi:10.1007/s11069-006-9038-5,  
 623 2007.
- 624 Glade, T., and Crozier, M.J.: The Nature of Landslide Hazard Impact, in: Landslide Hazard and Risk,  
 625 John Wiley & Sons Ltd, Chichester, England, 41–74, 2005.
- 626 Glade, T.: Landslide occurrence as a response to land use change: a review of evidence from New  
 627 Zealand, Catena, 51(3), 297–314, doi:10.1016/S0341-8162(02)00170-4, 2003.
- 628 Global Witness, Jade: Myanmar’s “big state secret”, Global Witness Report, October 2015:  
 629 [www.globalwitness.org](http://www.globalwitness.org), last access: 15 December 2016, 2015.
- 630 Govt. of India, Basic Road Statistics of India 2015-2016, Ministry of Road Transport and Highways,  
 631 Transport Research Wing, Government of India, New Delhi, India, 2016.
- 632 Govt. of Nepal, Statistics of strategic road network SSRN 2015/2016, Department of Roads, Ministry  
 633 of Physical Infrastructure and Transport, Government of Nepal, Nepal, 2016.
- 634 Grimm, A. M. and Tedeschi, R. G.: ENSO and Extreme Rainfall Events in South America, J. Clim.,  
 635 22(7), 1589–1609, doi:10.1175/2008JCLI2429.1, 2009.
- 636 Guha-Sapir, D., Below, R. and Hoyois, P. H.: EM-DAT: International Disaster Database,  
 637 <http://www.emdat.be>, Université Catholique de Louvain, Brussels, Belgium, last access 19 February  
 638 2018.
- 639 Haigh, M. J., Rawat, J. S. and Bartarya, S. K.: Environmental Indicators of Landslide Activity along  
 640 the Kilbury Road, Nainital, Kumaun Lesser Himalaya, Mt. Res. Dev., 9(1), 25–33,  
 641 doi:10.2307/3673462, 1989.



- 642 Hallegatte, S., Vogt-Schilb, A., Rozenberg, J., and Bangalore, M.: Unbreakable: Building the  
 643 Resilience of the Poor in the Face of Natural Disasters. World Bank Publications, Washington, USA,  
 644 201 pp., 2016.
- 645 He, J. and Liu, B.: The East Asian subtropical summer monsoon: Recent progress, *J. Meteorol. Res.*,  
 646 30(2), 135–155, doi:10.1007/s13351-016-5222-z, 2016.
- 647 He, J., Ju, J., Wen, Z., Junmei, L. and Jin, Q.: A review of recent advances in research on Asian  
 648 monsoon in China, *Adv. Atmos. Sci.*, 24(6), 972–992, doi:10.1007/s00376-007-0972-2, 2007.
- 649 Hearn, G. J. and Shakya, N. M.: Engineering challenges for sustainable road access in the Himalayas,  
 650 doi:10.1144/qjegh2016-109, 2017.
- 651 Hearn, G. J. (ed.): Slope Engineering for Mountain Roads. Geological Society, London, Engineering  
 652 Geology Special Publications, 24, 2011.
- 653 Hervás, J., and Bobrowsky, P.: Mapping: Inventories, susceptibility, hazard and risk, in: Sassa, K. and  
 654 Canuti, P. (Eds.), *Landslides – Disaster Risk Reduction*, Springer, Berlin, Germany, 321–349, 2009.
- 655 Holcombe, E. A., Beesley, M. E. W., Vardanega, P. J. and Sorbie, R.: Urbanisation and landslides:  
 656 hazard drivers and better practices, *Proc. Inst. Civ. Eng. - Geotech. Eng.*, 169(3), 137–144,  
 657 doi:10.1680/jcien.15.00044, 2016.
- 658 Hong, Y., Adler, R. and Huffman, G.: Use of satellite remote sensing data in the mapping of global  
 659 landslide susceptibility, *Nat. Hazards*, 43(2), 245–256, doi:10.1007/s11069-006-9104-z, 2007.
- 660 Hruschka, F. and Echavarría, C., *Rock-Solid Chances for Responsible Artisanal Mining*, Series on  
 661 Responsible ASM No.3, Alliance for Responsible Mining, 2011.
- 662 Hungr, O., Leroueil, S. and Picarelli, L.: The Varnes classification of landslide types, an update,  
 663 *Landslides*, 11(2), 167–194, doi:10.1007/s10346-013-0436-y, 2014.



- 664 Imaizumi, F., Sidle, R. C. and Kamei, R.: Effects of forest harvesting on the occurrence of landslides  
 665 and debris flows in steep terrain of central Japan, *Earth Surf. Processes Landforms*, 33(6), 827–840,  
 666 doi:10.1002/esp.1574, 2008.
- 667 Innes, J. L.: Lichenometric dating of debris-flow deposits in the Scottish Highlands, *Earth Surf.*  
 668 *Processes Landforms*, 8(6), 579–588, doi:10.1002/esp.3290080609, 1983.
- 669 Islam, M. S., Jahid Hasan, G. M. and Chowdhury, M. A. I.: Destroying hills in the northeastern part of  
 670 Bangladesh: A qualitative assessment of extent of the problem and its probable impact, *Int. J.*  
 671 *Environ. Sci. Technol.*, 2(4), 301–308, doi:10.1007/BF03325890, 2006.
- 672 Ives, J.D. and Messerli, B., *The Himalayan Dilemma: Reconciling Development and Conservation*,  
 673 The United Nations University, Routledge, London, 1989.
- 674 Jones, S., Oven, K. J. and Wisner, B.: A comparison of the governance landscape of earthquake risk  
 675 reduction in Nepal and the Indian State of Bihar, *International Journal of Disaster Risk Reduction*, 15,  
 676 29–42, doi:10.1016/j.ijdr.2015.10.011, 2016.
- 677 Kim, J.-H., Ho, C.-H., Kim, H.-S. and Choi, W.: 2010 Western North Pacific Typhoon Season:  
 678 Seasonal Overview and Forecast Using a Track-Pattern-Based Model, *Weather Forecast.*, 27(3), 730–  
 679 743, doi:10.1175/WAF-D-11-00109.1, 2012.
- 680 Kirschbaum, D., Stanley, T. and Zhou, Y.: Spatial and temporal analysis of a global landslide catalog,  
 681 *Geomorphology*, 249, 4–15, doi:10.1016/j.geomorph.2015.03.016, 2015.
- 682 Kirschbaum, D., Adler, R., Adler, D., Peters-Lidard, C. and Huffman, G.: Global Distribution of  
 683 Extreme Precipitation and High-Impact Landslides in 2010 Relative to Previous Years, *J.*  
 684 *Hydrometeorol.*, 13(5), 1536–1551, doi:10.1175/JHM-D-12-02.1, 2012.
- 685 Kirschbaum, D. B., Adler, R., Hong, Y., Hill, S. and Lerner-Lam, A.: A global landslide catalog for  
 686 hazard applications: method, results, and limitations, *Nat. Hazards*, 52(3), 561–575,  
 687 doi:10.1007/s11069-009-9401-4, 2010.



- 688 Kubota, H., Shirooka, R., Matsumoto, J., Cayan, E. O. and Hilario, F. D.: Tropical cyclone  
 689 influence on the long-term variability of Philippine summer monsoon onset, *Prog Earth Planet Sci*,  
 690 4(1), 27, doi:10.1186/s40645-017-0138-5, 2017.
- 691 Kumar, A. and Jaiswal, A.: Empirical Study of Twitter and Tumblr for Sentiment Analysis using Soft  
 692 Computing Techniques, in *Proceedings of the World Congress on Engineering and Computer*  
 693 *Science*, vol. 1, iaeng.org. [online] Available from:  
 694 [http://www.iaeng.org/publication/WCECS2017/WCECS2017\\_pp472-476.pdf](http://www.iaeng.org/publication/WCECS2017/WCECS2017_pp472-476.pdf), 2017.
- 695 Kumar, A. and Pushplata: Building regulations for hill towns of India, *HBRC Journal*, 11(2), 275–  
 696 284, doi:10.1016/j.hbrej.2014.06.006, 2015.
- 697 Lee, C.-F., Huang, W.-K., Chang, Y.-L., Chi, S.-Y. and Liao, W.-C.: Regional landslide susceptibility  
 698 assessment using multi-stage remote sensing data along the coastal range highway in northeastern  
 699 Taiwan, *Geomorphology*, 300, 113–127, doi:10.1016/j.geomorph.2017.10.019, 2018.
- 700 Lennartz, T.: Constructing Roads—Constructing Risks? Settlement Decisions in View of Landslide  
 701 Risk and Economic Opportunities in Western Nepal, *Mt. Res. Dev.*, 33(4), 364–371,  
 702 doi:10.1659/MRD-JOURNAL-D-13-00048.1, 2013.
- 703 Lonigro, T., Gentile, F. and Polemio, M.: The influence of climate variability and land use variations  
 704 on the occurrence of landslide events (Subappennino Dauno, Southern Italy), *Rend. Online Soc. Geol.*  
 705 *Ital.*, 35, 192–195, doi: 10.3301/ROL.2015.98, 2015.
- 706 Lu, B., Ren, H.-L., Scaife, A. A., Wu, J., Dunstone, N., Smith, D., Wan, J., Eade, R., MacLachlan, C.  
 707 and Gordon, M.: An extreme negative Indian Ocean Dipole event in 2016: dynamics and  
 708 predictability, *Clim. Dyn.*, 1–12, doi:10.1007/s00382-017-3908-2, 2017.
- 709 Lyon, B. and Camargo, S. J.: The seasonally-varying influence of ENSO on rainfall and tropical  
 710 cyclone activity in the Philippines, *Clim. Dyn.*, 32(1), 125–141, doi:10.1007/s00382-008-0380-z,  
 711 2009.



- 712 Ma, L. J. C.: Urban Transformation in China, 1949 – 2000: A Review and Research Agenda, Environ.  
 713 Plan. A, 34(9), 1545–1569, doi:10.1068/a34192, 2002.
- 714 Magaña, V. O., Vázquez, J. L., Pérez, J. L. and Pérez, J. B.: Impact of El Niño on precipitation in  
 715 Mexico, Geofísica internacional, 42(3), 313–330 [online] Available from:  
 716 [http://www.geofisica.unam.mx/iframes/editorial/publicaciones/investigacion/geofisica\\_internacional/a](http://www.geofisica.unam.mx/iframes/editorial/publicaciones/investigacion/geofisica_internacional/anteriores/2003/03/magana.pdf)  
 717 [nteriores/2003/03/magana.pdf](http://www.geofisica.unam.mx/iframes/editorial/publicaciones/investigacion/geofisica_internacional/anteriores/2003/03/magana.pdf), 2003.
- 718 Moreiras, S. M.: Climatic effect of ENSO associated with landslide occurrence in the Central Andes,  
 719 Mendoza Province, Argentina, Landslides, 2(1), 53–59, doi:10.1007/s10346-005-0046-4, 2005.
- 720 Murshed, M. M.: Cutting of hills and human tragedy: An example of law enforcement loophole in the  
 721 southeastern region of Bangladesh, International Journal of Geomatics and Geosciences, 4(2), 410  
 722 [online] Available from: <http://www.ipublishing.co.in/jggsarticles/volfour/EIJGGS4035.pdf>, 2013.
- 723 Naylor, R. L., Battisti, D. S., Vimont, D. J., Falcon, W. P. and Burke, M. B.: Assessing risks of  
 724 climate variability and climate change for Indonesian rice agriculture, Proc. Natl. Acad. Sci. U. S. A.,  
 725 104(19), 7752–7757, doi:10.1073/pnas.0701825104, 2007.
- 726 NOAA, Tropical Cyclone Climatology, National Oceanic and Atmospheric Administration National  
 727 Hurricane Center: <https://www.nhc.noaa.gov/climo/>, last access: 20 February 2018a.
- 728 NOAA, Cold and Warm episodes by season, Historical El Nino / La Nina episodes (1950-present),  
 729 National Oceanic and Atmospheric Administration National Hurricane Center:  
 730 [http://origin.cpc.ncep.noaa.gov/products/analysis\\_monitoring/ensostuff/ONI\\_v5.php](http://origin.cpc.ncep.noaa.gov/products/analysis_monitoring/ensostuff/ONI_v5.php), last access: 20  
 731 February 2018b.
- 732 NOAA, Historical Hurricane Tracks: <https://coast.noaa.gov/hurricanes/>, last access: 20 February  
 733 2018c.
- 734 Oven, K.J., Petley, D.N., Rigg, J.R., Dunn, C.E. and Rosser, N.J., Landscape, livelihoods and risk: A  
 735 study of community vulnerability to landslide events in Central Nepal, in: Aryal, K.R. and Gadema,



- 736 Z. Climate change and disaster risk reduction, Disaster and Development Centre, School of Applied  
 737 Science, Northumbria University, 94-102, 2008.
- 738 Petley, D.: Global patterns of loss of life from landslides, *Geology*, 40(10), 927–930,  
 739 doi:10.1130/G33217.1, 2012.
- 740 Petley, D. N.: On the impact of climate change and population growth on the occurrence of fatal  
 741 landslides in South, East and SE Asia, *Q. J. Eng. Geol. Hydrogeol.*, 43(4), 487–496,  
 742 doi:10.1144/1470-9236/09-001, 2010.
- 743 Petley, D. N.: On the impact of urban landslides, Geological Society, London, Engineering Geology  
 744 Special Publications, 22(1), 83–99, doi:10.1144/EGSP22.6, 2009.
- 745 Petley, D. N., Hearn, G. J., Hart, A., Rosser, N. J., Dunning, S. A., Oven, K. and Mitchell, W. A.:  
 746 Trends in landslide occurrence in Nepal, *Nat. Hazards*, 43(1), 23–44, doi:10.1007/s11069-006-9100-  
 747 3, 2007.
- 748 Petley, D. N., Dunning, S. A. and Rosser, N. J.: The analysis of global landslide risk through the  
 749 creation of a database of worldwide landslide fatalities, in: Hungr, O., Fell, R., Couture, R. and  
 750 Eberhardt, E. (Eds.) *Landslide Risk Management*, Taylor and Francis, London, UK, 367 – 373, 2005.
- 751 Rao, V. B. and Hada, K.: Characteristics of rainfall over Brazil: Annual variations and connections  
 752 with the Southern Oscillation, *Theor. Appl. Climatol.*, 42(2), 81–91, doi:10.1007/BF00868215, 1990.
- 753 Sati, S. P., Sundriyal, Y. P. and Rana, N.: Recent landslides in Uttarakhand: nature’s fury or human  
 754 folly, *Curr. Sci.* [online] Available from:  
 755 [https://www.researchgate.net/profile/Naresh\\_Rana/publication/285718177\\_Recent\\_landslides\\_in\\_Utt](https://www.researchgate.net/profile/Naresh_Rana/publication/285718177_Recent_landslides_in_Uttarakhand_Nature's_fury_or_human_folly/links/574e94cf08ae82d2c6be314c.pdf)  
 756 [arakhand\\_Nature's\\_fury\\_or\\_human\\_folly/links/574e94cf08ae82d2c6be314c.pdf](https://www.researchgate.net/profile/Naresh_Rana/publication/285718177_Recent_landslides_in_Uttarakhand_Nature's_fury_or_human_folly/links/574e94cf08ae82d2c6be314c.pdf), 2011.
- 757 Schneider, A. and Woodcock, C. E.: Compact, Dispersed, Fragmented, Extensive? A Comparison of  
 758 Urban Growth in Twenty-five Global Cities using Remotely Sensed Data, Pattern Metrics and Census  
 759 Information, *Urban Stud.*, 45(3), 659–692, doi:10.1177/0042098007087340, 2008.



- 760 Sepúlveda, S. A. and Petley, D. N.: Regional trends and controlling factors of fatal landslides in Latin  
 761 America and the Caribbean, Nat. Hazards Earth Syst. Sci., 15(8), 1821–1833, doi:10.5194/nhess-15-  
 762 1821-2015, 2015.
- 763 Sierra, J. P., Arias, P. A. and Vieira, S. C.: Precipitation over Northern South America and Its  
 764 Seasonal Variability as Simulated by the CMIP5 Models, Advances in Meteorology, 2015,  
 765 doi:10.1155/2015/634720, 2015.
- 766 Singh, R., Umrao, R. K. and Singh, T. N.: Stability evaluation of road-cut slopes in the Lesser  
 767 Himalaya of Uttarakhand, India: conventional and numerical approaches, Bull. Eng. Geol. Environ.,  
 768 73(3), 845–857, doi:10.1007/s10064-013-0532-1, 2014.
- 769 Soldati, M., Corsini, A. and Pasuto, A.: Landslides and climate change in the Italian Dolomites since  
 770 the Late glacial, Catena, 55(2), 141–161, doi:10.1016/S0341-8162(03)00113-9, 2004.
- 771 Smyth, C. G. and Royle, S. A.: Urban landslide hazards: incidence and causative factors in Niterói,  
 772 Rio de Janeiro State, Brazil, Appl. Geogr., 20(2), 95–118, doi:10.1016/S0143-6228(00)00004-7,  
 773 2000.
- 774 Srivastava, A., Goyal, C.R., Jain, A., Review of Causes of foundation failures and their possible  
 775 preventive and remedial measures, in: Proceedings of 4<sup>th</sup> KKKU- International Engineering Conference  
 776 (KKU-IENC2012), Khon Kaen, Thailand, 10 – 12 May 2012, 2012.
- 777 Stanley, T. and Kirschbaum, D. B.: A heuristic approach to global landslide susceptibility mapping,  
 778 Nat. Hazards, 87(1), 145–164, doi:10.1007/s11069-017-2757-y, 2017.
- 779 Taylor, F. E., Malamud, B. D., Freeborough, K. and Demeritt, D.: Enriching Great Britain’s National  
 780 Landslide Database by searching newspaper archives, Geomorphology , 249, 52–68,  
 781 doi:10.1016/j.geomorph.2015.05.019, 2015.
- 782 Tedeschi, R. G., Cavalcanti, I. F. A. and Grimm, A. M.: Influences of two types of ENSO on South  
 783 American precipitation, Int. J. Climatol., 33(6), 1382–1400, doi:10.1002/joc.3519, 2013.



- 784 The Economist, Rubies in the sky with diamonds: <http://www.economist.com/node/21528623>, last  
 785 access: 20 February 2018, 2011.
- 786 Trenberth, K. E. and Shea, D. J.: Atlantic hurricanes and natural variability in 2005, *Geophys. Res.*  
 787 *Lett.*, 33(12), L12704, doi:10.1029/2006GL026894, 2006.
- 788 Tschoegl, L., Below, R., Guha-Sapir, D.: An analytical review of selected data sets on natural  
 789 disasters and impacts, Centre for Research on the Epidemiology of Disasters, UNDP/CRED  
 790 Workshop on Improving Compilation of Reliable Data on Disaster Occurrence and Impact, Bangkok,  
 791 Thailand, 21 pp., 2006.
- 792 Turner, A. G. and Annamalai, H.: Climate change and the South Asian summer monsoon, *Nat. Clim.*  
 793 *Chang.*, 2, 587, doi:10.1038/nclimate1495, 2012.
- 794 UNESCO: Annual summary of information on natural disasters, no.6: 1971, United Nations  
 795 Educational, Scientific and Cultural Organization, Paris, France, 82 pp., 1973
- 796 United Nations Statistics Division (UNSD): Standard country or area codes for statistical use,  
 797 <http://unstats.un.org/unsd/methods/m49/m49.htm>, last access: 10/8/2016, 2018.
- 798 Valdiya, K. S.: Catastrophic Landslides in Uttaraanchal, Central Himalaya, *J. Geol. Soc. India*, 52(4),  
 799 483–486 [online] Available from: <http://52.172.159.94/index.php/jgsi/article/view/68951/54115>  
 800 (Accessed 8 February 2018), 1998.
- 801 Van Den Eeckhaut, M. and Hervás, J.: State of the art of national landslide databases in Europe and  
 802 their potential for assessing landslide susceptibility, hazard and risk, *Geomorphology*, 139–140, 545–  
 803 558, doi:10.1016/j.geomorph.2011.12.006, 2012.
- 804 van Westen, C. J., Castellanos, E. and Kuriakose, S. L.: Spatial data for landslide susceptibility,  
 805 hazard, and vulnerability assessment: An overview, *Eng. Geol.*, 102(3), 112–131,  
 806 doi:10.1016/j.enggeo.2008.03.010, 2008.
- 807 Varnes, D. J. and IAEG Commission on Landslides: Landslide hazard zonation: a review of principles  
 808 and practice: Paris, UNESCO, Paris, France, 63 pp., 1984





- 809 Webster, P. J., Magaña, V. O., Palmer, T. N., Shukla, J., Tomas, R. A., Yanai, M. and Yasunari, T.:  
 810 Monsoons: Processes, predictability, and the prospects for prediction, *J. Geophys. Res.*, 103(C7),  
 811 14451–14510, doi:10.1029/97JC02719, 1998.
- 812 World Bank, Transport: At a Glance, The World Bank,  
 813 <http://www.worldbank.org/en/topic/transport/overview>, last access: 22/02/2018b.
- 814 World Bank, The World Bank data, <https://data.worldbank.org/indicator/>, last access: 19/02/2018a
- 815 Wu, X., Chen, X., Benjamin Zhan, F. and Hong, S.: Global research trends in landslides during 1991–  
 816 2014: a bibliometric analysis, *Landslides*, 12(6), 1215–1226, doi:10.1007/s10346-015-0624-z, 2015.
- 817 Xie, P., Janowiak, J. E., Arkin, P. A., Adler, R., Gruber, A., Ferraro, R., Huffman, G. J. and Curtis, S.:  
 818 GPCP Pentad Precipitation Analyses: An Experimental Dataset Based on Gauge Observations and  
 819 Satellite Estimates, *J. Clim.*, 16(13), 2197–2214, doi:10.1175/2769.1, 2003.
- 820 Yang, H., Xia, J., Thompson, J. R. and Flower, R. J.: Urban construction and demolition waste and  
 821 landfill failure in Shenzhen, China, *Waste Manag.*, 63, 393–396, doi:10.1016/j.wasman.2017.01.026,  
 822 2017.
- 823 Yang, F. and Lau, K.-M.: Trend and variability of China precipitation in spring and summer: linkage  
 824 to sea-surface temperatures, *International Journal of Climatology*, 24(3), DOI: 10.1002/joc.1094,  
 825 2004.
- 826 Yu, K., Wang, S. and Li, D.: The negative approach to urban growth planning of Beijing, China, *J.*  
 827 *Environ. Planning Manage.*, 54(9), 1209–1236, doi:10.1080/09640568.2011.564488, 2011.
- 828 Zhang, F., Liu, G., Chen, W., Liang, S., Chen, R. and Han, W.: Human-induced landslide on a high  
 829 cut slope: a case of repeated failures due to multi-excavation, *Journal of Rock Mechanics and*  
 830 *Geotechnical Engineering*, 4(4), 367–374, doi:10.3724/SP.J.1235.2012.00367, 2012.
- 831 Zhou, T., Wu, B. and Dong, L.: Advances in research of ENSO changes and the associated impacts on  
 832 Asian-Pacific climate, *Asia-Pacific J Atmos Sci*, 50(4), 405–422, doi:10.1007/s13143-014-0043-4,  
 833 2014.

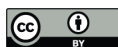

834 Zou, F., Zhan, Q. and Zhang, W.: Quantifying the impact of human activities on geological hazards in  
835 mountainous areas: evidence from Shennongjia, China, Nat. Hazards, 90(1), 137–155,  
836 doi:10.1007/s11069-017-3039-4, 2018.

837



## 838 Tables

### 839 Table 1 Landslide trigger classification.

| Classification                                         | Definition                                                                                                                                                                                                                                                                                                                                                                                                                                                                                                                                                                                                                                                                                                                                 | Keyword search terms                                                                                                                                                       |
|--------------------------------------------------------|--------------------------------------------------------------------------------------------------------------------------------------------------------------------------------------------------------------------------------------------------------------------------------------------------------------------------------------------------------------------------------------------------------------------------------------------------------------------------------------------------------------------------------------------------------------------------------------------------------------------------------------------------------------------------------------------------------------------------------------------|----------------------------------------------------------------------------------------------------------------------------------------------------------------------------|
| unknown                                                | No trigger or obvious cause specified                                                                                                                                                                                                                                                                                                                                                                                                                                                                                                                                                                                                                                                                                                      | -                                                                                                                                                                          |
| precipitation                                          | Rainfall raises pore-pressure in slope materials triggering failure.                                                                                                                                                                                                                                                                                                                                                                                                                                                                                                                                                                                                                                                                       | "rain", "sleet", "storm", "hurricane",<br>"precipitation", "flood", "water", "torrent"                                                                                     |
| earthquake                                             | Strong ground motion associated with earthquakes weaken slope materials triggering failure (coseismic landslides).                                                                                                                                                                                                                                                                                                                                                                                                                                                                                                                                                                                                                         | "earthquake", "aftershock", "seismic",<br>"tremor"                                                                                                                         |
| illegal mining                                         | Unregulated or informal mining of slope materials in designated quarry or mine, where permission to extract material has not been granted.                                                                                                                                                                                                                                                                                                                                                                                                                                                                                                                                                                                                 | "illegal", "permit", "regulat", "close",<br>"informal", "pick", "illicit", "abandoned",<br>"traditional", "license", "ban", "mine",<br>"quarry", "spoil", "pit", "excavat" |
| illegal hillcutting                                    | Hillcutting refers to the process of removing material from a hillslope for the purposes of altering its shape and/or to obtain slope material for use in construction, manufacture or farming. It is differentiated from mining, because it occurs on slopes that are not within a designated site of mining or quarrying, instead hillcutting typically occurs on individual slopes on steep agricultural land or on man-made slopes such as those along transport routes. Hillcutting differs from construction, because slope modification does not follow an engineering design to ensure slope stability. Hillcutting is assumed to be undertaken in an informal, unregulated manner (this is frequently noted in landslide reports) | "hillcut", "illegal", "permit", "regulat",<br>"informal", "illicit", "traditional", "license",<br>"ban", "excavat"                                                         |
| legal mining                                           | Regulated and/or permitted mining of slope materials in designated quarry or mine, where permission to extract material has been granted and operations are managed.                                                                                                                                                                                                                                                                                                                                                                                                                                                                                                                                                                       | "legal", "permit", "regulat", "pick",<br>"license", "mine", "quarry", "spoil", "pit",<br>"excavat"                                                                         |
| mining (unknown)                                       | Slope materials are extracted from a designated quarry or mine, but the report does not make it clear if the extraction is permitted or not.                                                                                                                                                                                                                                                                                                                                                                                                                                                                                                                                                                                               | "quarry", "mine", "spoil", "pit", "excavat"                                                                                                                                |
| construction                                           | Permitted modification of a slope for the purposes of a construction project undertaken by professional labourers, following planning approval                                                                                                                                                                                                                                                                                                                                                                                                                                                                                                                                                                                             | "excavat", "construction", "site", "road",<br>"build", "dig", "labour"                                                                                                     |
| conflict and explosion                                 | Landslide triggered by the detonation of an explosive device during military combat                                                                                                                                                                                                                                                                                                                                                                                                                                                                                                                                                                                                                                                        | "bomb", "mine", "soldier", "army",<br>"explode", "explosion", "war", "conflict"                                                                                            |
| leaking pipe                                           | Utility pipes carrying water that have been damaged and leak water onto a slope surface or within the hillslope, compromising its stability.                                                                                                                                                                                                                                                                                                                                                                                                                                                                                                                                                                                               | "pipe", "leak", "burst"                                                                                                                                                    |
| garbage collapse                                       | Collapse of piles of municipal waste onto people, where stability of waste piles was disturbed by the passage of a person or persons                                                                                                                                                                                                                                                                                                                                                                                                                                                                                                                                                                                                       | "waste", "trash", "rubbish", "garbage",<br>"dump", "pick"                                                                                                                  |
| recreation                                             | Triggered by passage of a person or persons walking/ climbing over a hillslope for recreation.                                                                                                                                                                                                                                                                                                                                                                                                                                                                                                                                                                                                                                             | "climb", "mountain", "expedition", "ascent",<br>"trek"                                                                                                                     |
| human action (unspecified)                             | Landslide report refers to a person or people present on a hillslope that collapses, without specifying the reason people occupied the slope or the landslide trigger                                                                                                                                                                                                                                                                                                                                                                                                                                                                                                                                                                      | "people", "person", "men", "women",<br>"children", "occup"                                                                                                                 |
| animal activity                                        | Occupation of slope by animal triggering failure, either by weight and movement of animal on slope surface, or by burrowing within the slope subsurface.                                                                                                                                                                                                                                                                                                                                                                                                                                                                                                                                                                                   | "animal", "burrow", "tunnel"                                                                                                                                               |
| fire                                                   | Naturally occurring or man-made fires, typically occurring in dry climates on vegetated terrain.                                                                                                                                                                                                                                                                                                                                                                                                                                                                                                                                                                                                                                           | "fire"                                                                                                                                                                     |
| natural dam or riverbank collapse                      | Collapse of a riverbank or natural dam without an apparent trigger, but likely caused by pore pressures building over time to a critical threshold in response to water levels. Material typically fails into a body of water, and often generates a flood wave.                                                                                                                                                                                                                                                                                                                                                                                                                                                                           | "river", "bank", "dam", "earth", "flood",<br>"wave", "collapse"                                                                                                            |
| freezing                                               | Heavy snowfall and expansion of water in hillslopes due to freezing, acting solely or together to destabilise the slope.                                                                                                                                                                                                                                                                                                                                                                                                                                                                                                                                                                                                                   | "snow", "extreme", "freeze", "ice", "cold"                                                                                                                                 |
| freeze thaw (temperature change cold to hot), snowmelt | Failure of slope materials in response to temperature rise, including landslides triggered by the melting of snow or permafrost (in a non-volcanic setting)                                                                                                                                                                                                                                                                                                                                                                                                                                                                                                                                                                                | "snow", "melt", "permafrost", "spring",<br>"temperature"                                                                                                                   |
| volcanic eruption                                      | Landslides (and mudflows) occurring in a volcanic environment triggered by volcanic activity- such as explosions and volcano-tectonic seismicity. This does not include events in active volcanic environments triggered by rainfall.                                                                                                                                                                                                                                                                                                                                                                                                                                                                                                      | "volcan", "seismic", "activity", "eruption"                                                                                                                                |
| marine erosion                                         | Triggered by sea erosion (only)- repeat wave impact                                                                                                                                                                                                                                                                                                                                                                                                                                                                                                                                                                                                                                                                                        | "coast", "sea", "erode"                                                                                                                                                    |

840

841

842



843 **Table 2.** Spearman's rank correlation between mean daily rainfall and mean daily landslides by  
 844 month (see Fig. 5).

| Region          | Correlation Coefficient | P value |
|-----------------|-------------------------|---------|
| Central America | 0.8153                  | 0.0012  |
| South America   | 0.8062                  | 0.0015  |
| South East Asia | 0.17                    | 0.5974  |
| South Asia      | 0.996                   | 0       |
| East Asia       | 0.9701                  | 0       |

845

846 **Table B1.** Hierarchal linear regression results comparing the impact of seasonality in geographical  
 847 regions with the global mean number of landslides per pentad through the annual cycle (see Fig. 4).  
 848 The data series for each geographical region are sequentially added into the regression (such that the  
 849 second row of the table is a regression of S.Asia + S.E. Asia with the global series).

| Predictor Variables | N (cumulative) | % (of total N) | R <sup>2</sup> | ΔR <sup>2</sup> |
|---------------------|----------------|----------------|----------------|-----------------|
| + S. Asia           | 1295           | 31.50          | 0.4962         |                 |
| + SE. Asia          | 2121           | 52.27          | 0.7365         | 0.2403          |
| + E. Asia           | 2804           | 71.88          | 0.8618         | 0.1253          |
| + S. America        | 3145           | 82.25          | 0.9129         | 0.0511          |
| + C. America        | 3340           | 88.03          | 0.9575         | 0.0446          |

850

851

852

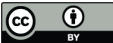

853 Fig. 1

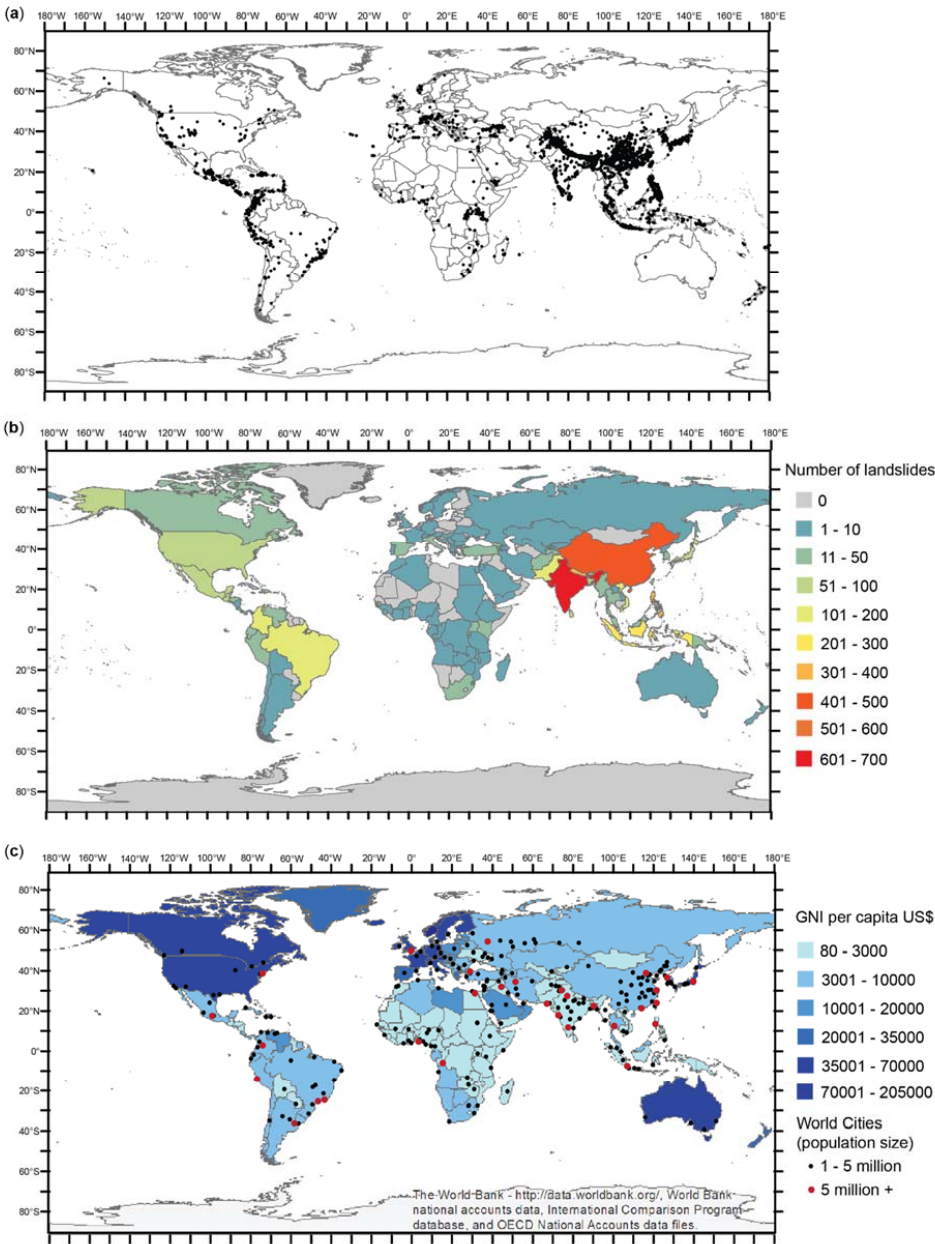

854

855



856 **Fig. 2**

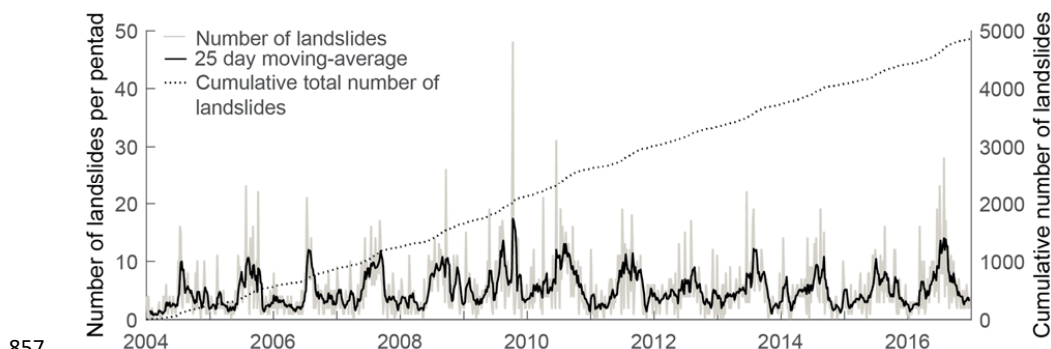

858

859 **Fig. 3**

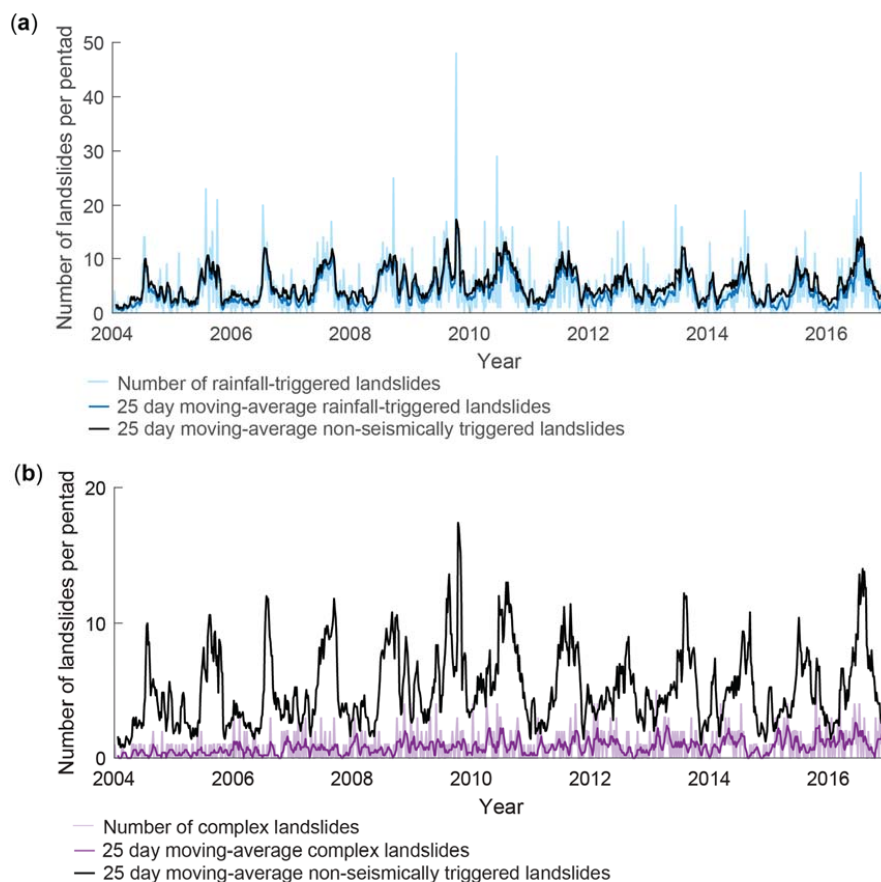

860



861 **Fig. 4**

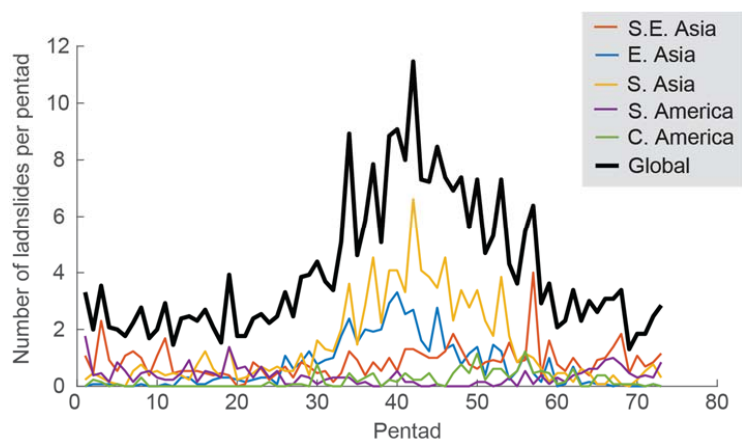

862

863 **Fig. 5**

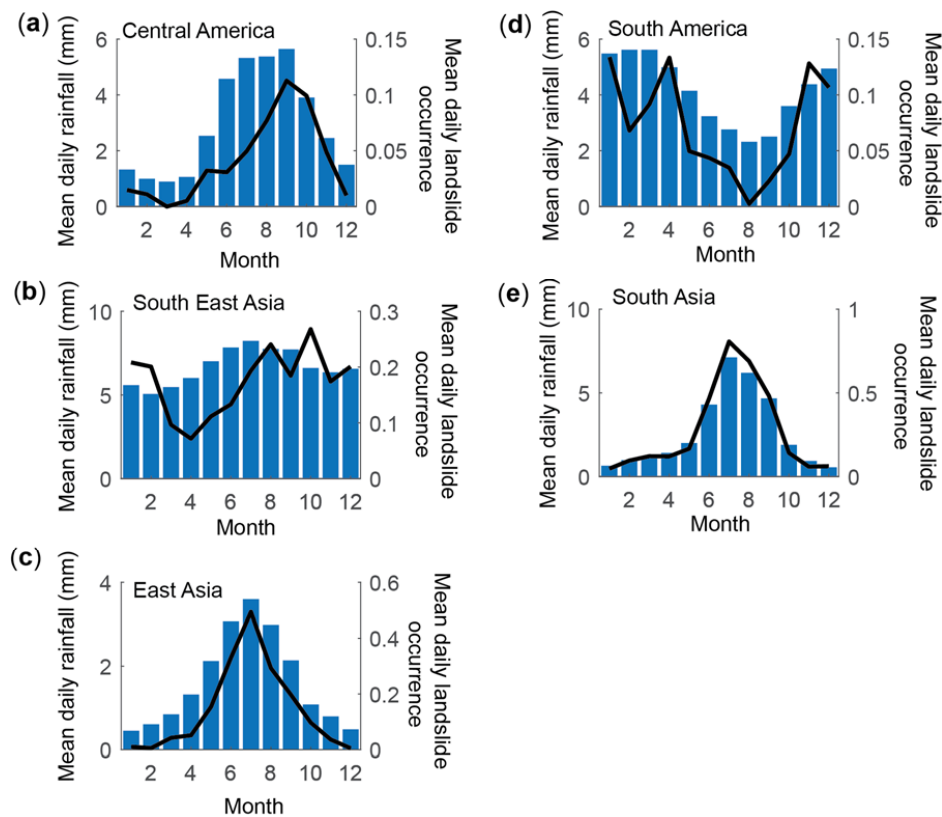

864



865 **Fig. 6**

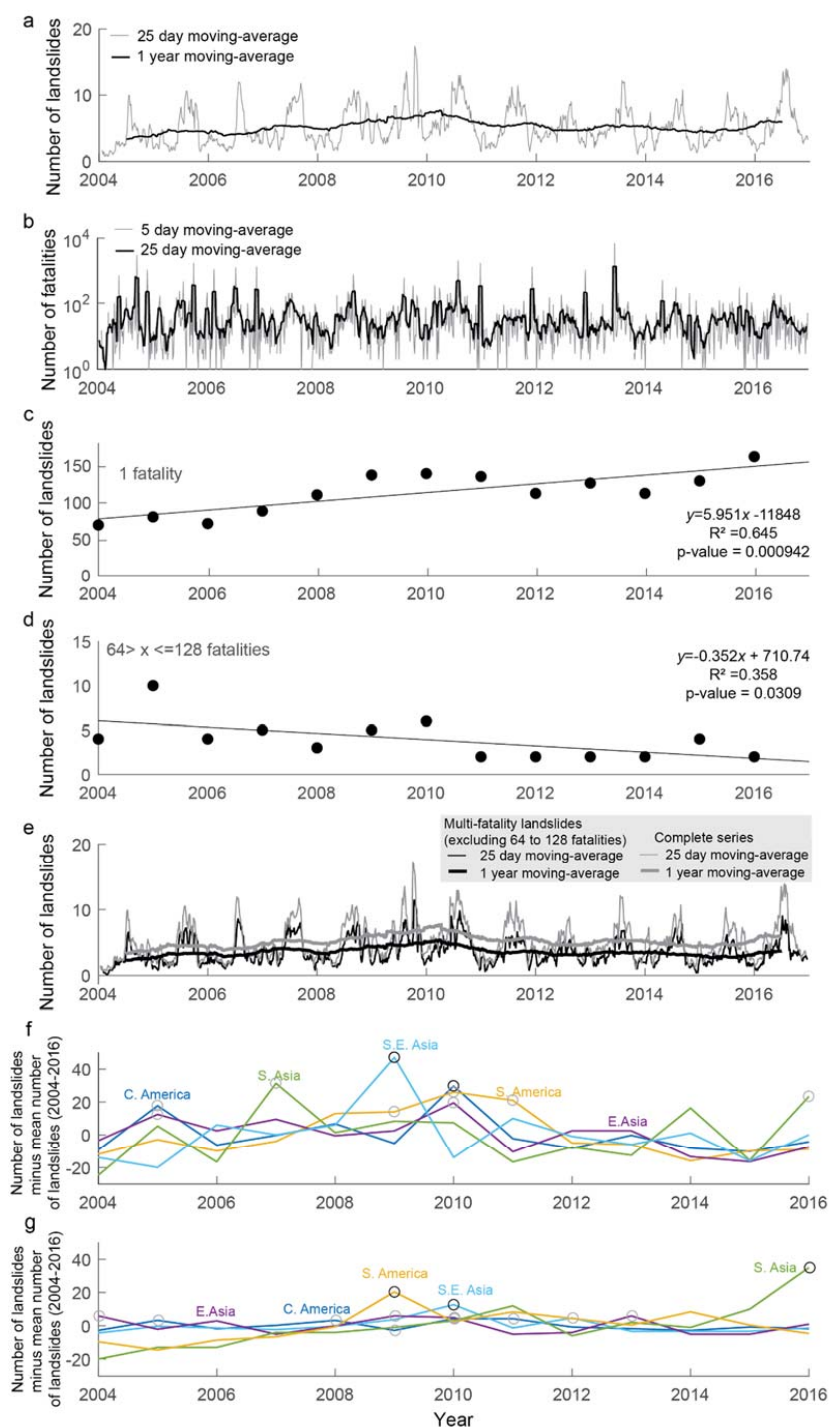

866





867 **Fig. 7**

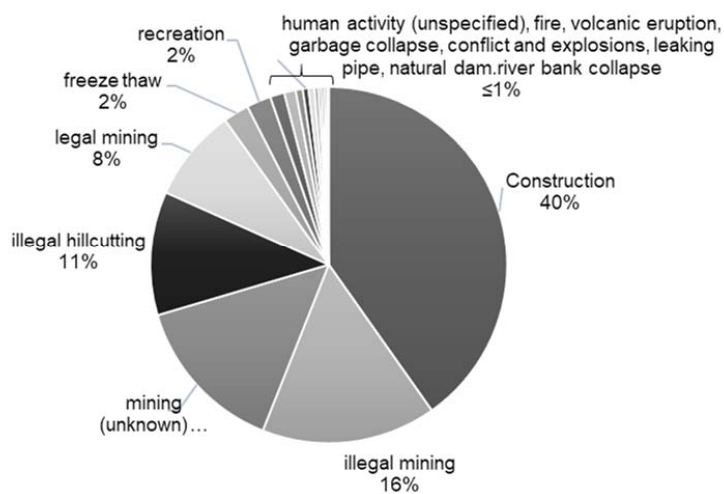

868

869

870

871

872

873

874

875

876

877

878

879

880



881 **Fig. 8**

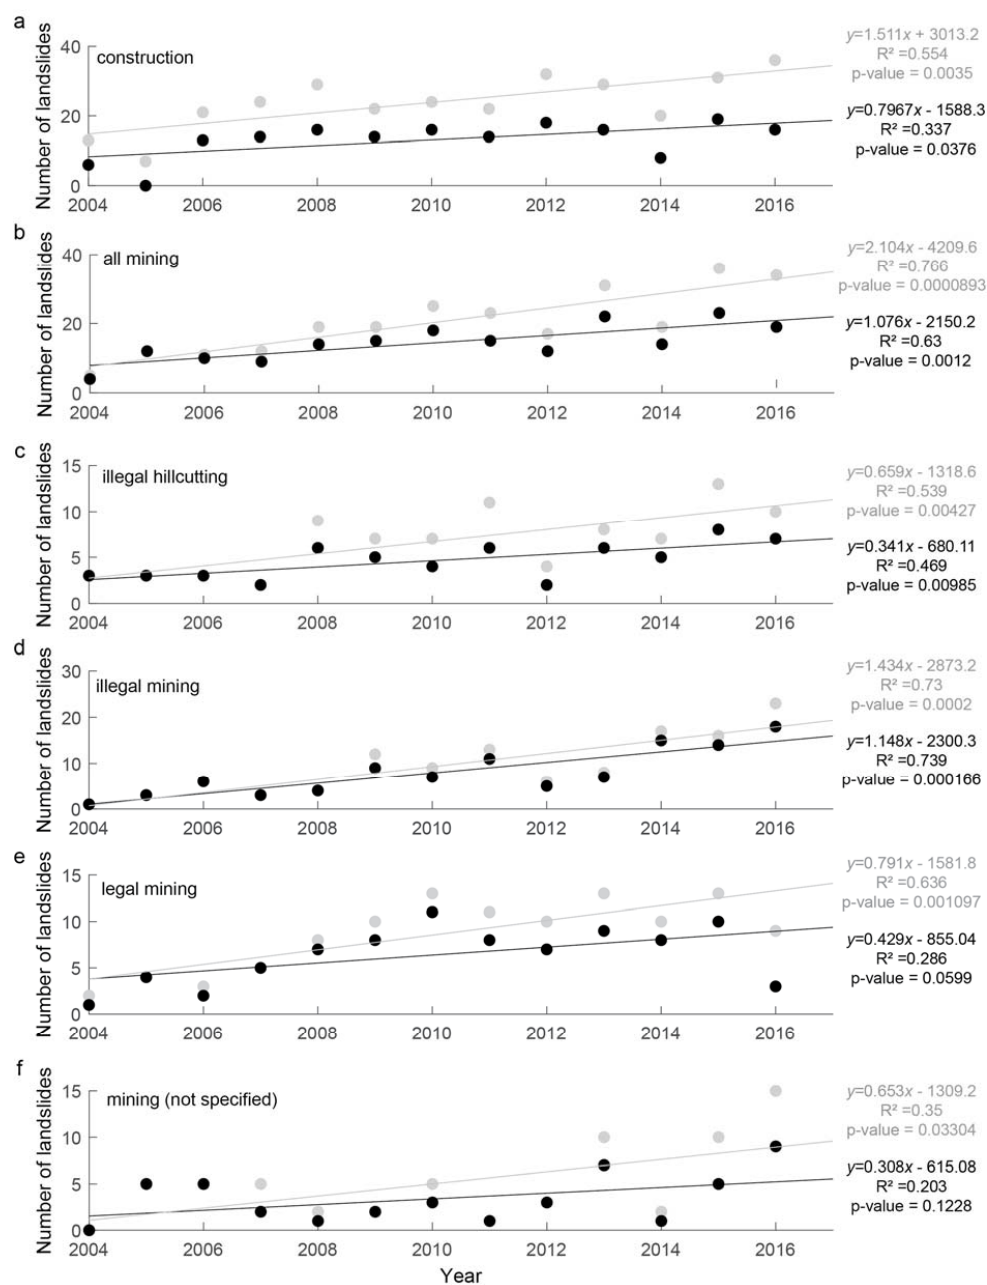

882

883

884



885 **Fig. 9**

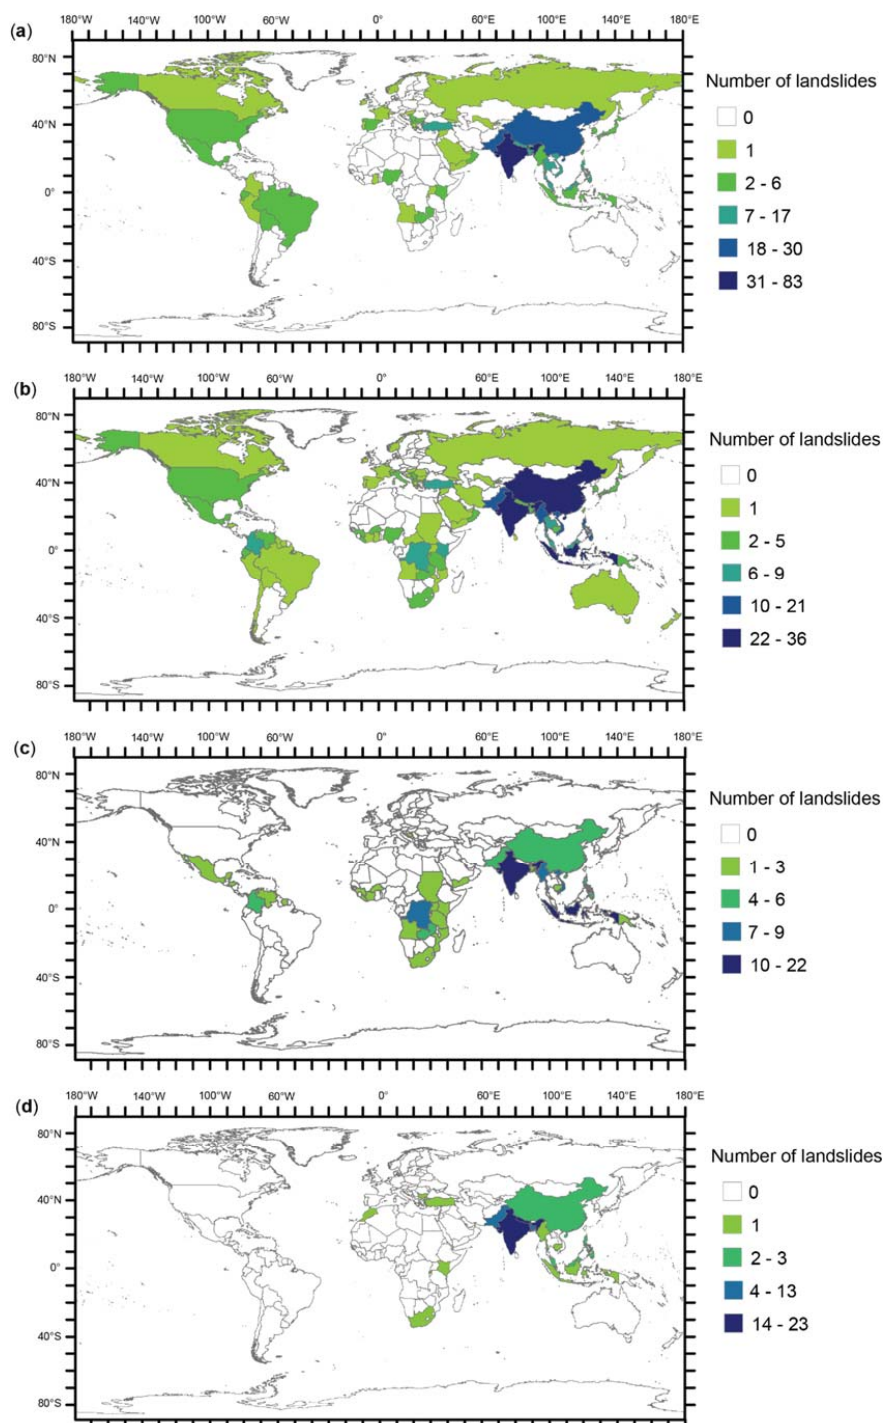

886



## 887 Appendix Figures

888 Fig. A1

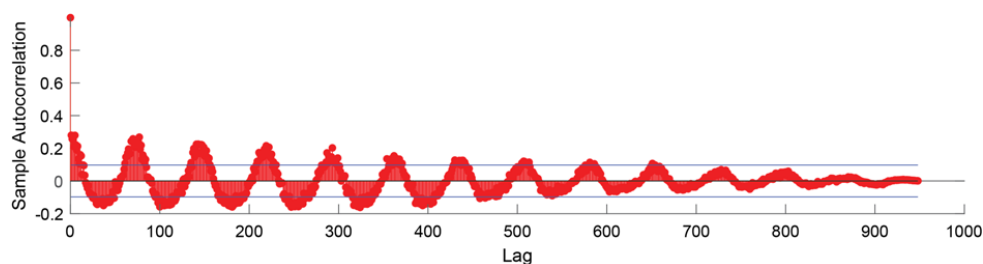

890 Fig. A2

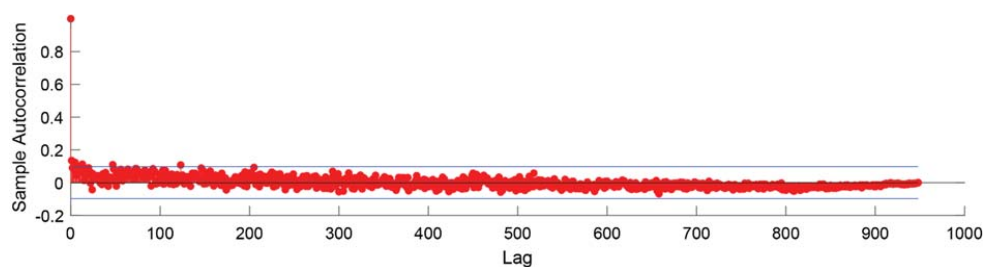

Supplement: Supplementary file [file nhess-2018-49-SC1-supplement.pdf]
